1 **Transient mitochondria dysfunction confers fungal cross-resistance between macrophages and**  
2 **fluconazole**

3 Sofía Siscar-Lewin<sup>1</sup>, Toni Gabaldón<sup>2, 3, 4</sup>, Alexander M. Aldejohann<sup>5</sup>, Oliver Kurzai<sup>5</sup>, Bernhard Hube<sup>1, 6</sup>,  
4 Sascha Brunke<sup>1,\*</sup>

5 <sup>1</sup>Department of Microbial Pathogenicity Mechanisms, Hans Knoell Institute. Adolf-Reichwein-Straße 23,  
6 07745, Jena, Germany

7 <sup>2</sup>Barcelona Supercomputing Centre (BSC-CNS). Jordi Girona 29, 08034, Barcelona, Spain.

8 <sup>3</sup>Institute for Research in Biomedicine (IRB Barcelona), The Barcelona Institute of Science and  
9 Technology. Baldiri Reixac 10, 08028, Barcelona, Spain

10 <sup>4</sup>Catalan Institution for Research and Advanced Studies (ICREA). Barcelona, Spain

11 <sup>5</sup>Institute for Hygiene and Microbiology. Julius-Maximilians-University. Josef-Schneider-Straße 2, 97080  
12 Würzburg, Germany

13 <sup>6</sup>Institute of Microbiology, Friedrich Schiller University. Neugasse 24, 07743 Jena, Germany

14 \*Correspondence: [sascha.brunke@leibniz-hki.de](mailto:sascha.brunke@leibniz-hki.de)

15 **ABSTRACT**

16 Loss or inactivation of antivirulence genes is an adaptive strategy in pathogen evolution. *Candida*  
17 *glabrata* is an important opportunistic pathogen related to baker's yeast, with the ability to both, quickly  
18 increase its intrinsic high level of azole resistance and persist within phagocytes. During *C. glabrata's*  
19 evolution as a pathogen, the mitochondrial DNA polymerase, CgMip1, has been under positive selection.  
20 We show that *CgMIP1* deletion not only triggers loss of mitochondrial function and a *petite* phenotype,  
21 but increases *C. glabrata's* azole and ER stress resistance, and importantly, its survival in phagocytes. The  
22 same phenotype is induced by fluconazole and by exposure to macrophages, conferring a cross-  
23 resistance between antifungals and immune cells, and can be found in clinical isolates despite its slow  
24 growth. This suggests that *petite* constitutes a bet-hedging strategy of *C. glabrata*, and potentially a  
25 relevant cause of azole resistance. Mitochondrial function may therefore be considered a potential  
26 antivirulence factor.

27 **Keywords:** fungal infection, *petite*, cross-resistance, antivirulence.

## 28 INTRODUCTION

29 Human pathogenic fungi remain an underestimated threat in global health, and the mortality rates of  
30 fungal infections worldwide are higher or similar to deaths due to malaria or tuberculosis (Bongomin,  
31 Gago, Oladele, & Denning, 2017; Kainz, Bauer, Madeo, & Carmona-Gutierrez, 2020). *Candida* species are  
32 among the most important human fungal pathogens and cause millions of mucosal and life-threatening  
33 systemic infections each year (Bongomin et al., 2017). *Candida glabrata* has become the second most  
34 common *Candida* species for immunocompromised patients, surpassed only by *C. albicans* as the  
35 primary cause of candidiasis (Lamoth, Lockhart, Berkow, & Calandra, 2018). However, most of the well-  
36 characterized pathogenicity mechanisms of *C. albicans* are not shared by *C. glabrata*, and unlike the first,  
37 *C. glabrata* does not cause significant host cell damage or elicit strong host immune responses (Brunke &  
38 Hube, 2013). Among the main clinical relevant attributes and pathogenic traits of *C. glabrata* are rather a  
39 high intrinsic resistance to azole antifungals and an ability to survive for long time and replicate within  
40 mononuclear phagocytes (Brunke & Hube, 2013; Gabaldon et al., 2013; Kasper, Seider, & Hube, 2015).  
41 Its redundant anti-oxidative stress mechanisms, combined with its ability to modify the phagosomal pH,  
42 may partially account for the remarkable ability to survive phagocytosis by macrophages (Cuellar-Cruz et  
43 al., 2008; Cuellar-Cruz, Lopez-Romero, Ruiz-Baca, & Zazueta-Sandoval, 2014; Seider et al., 2011). These  
44 facts have led to the speculation that *C. glabrata* may take advantage of these immune cells to succeed  
45 as a pathogen and disseminate within the host (Kasper et al., 2015).

46 Among the strategies that confer pathogenicity, the loss or inactivation of certain genes, termed  
47 antivirulence genes, is common in pathogenic microorganisms (Bliven & Maurelli, 2012): Cellular  
48 pathways and functions that are normally advantageous for the microbe can become superfluous or  
49 even disadvantageous under infection conditions, and the loss or inactivation of their encoding genes  
50 becomes adaptive during infection. Several examples of such antivirulence factors are known in human  
51 pathogenic fungi, and many more are likely to exist (Siscar-Lewin, Hube, & Brunke, 2019).

52 *C. glabrata* is more closely related to the brewer yeast *Saccharomyces cerevisiae* than to *C. albicans*  
53 (Dujon et al., 2004) and clusters with members of the Nakaseomyces group, a genus that includes other  
54 environmental and human-associated species (Gabaldon et al., 2013). In a systematic genomic  
55 comparison within this group, four genes showed hallmarks of positive selection in *C. glabrata* (Gabaldon  
56 et al., 2013). These genes exhibit a relatively high ratio of non-synonymous to synonymous mutations  
57 ( $d_N/d_S$ ), indicating positive selection during the diversification of *C. glabrata* as a species. Therefore, they

58 might be involved in *C. glabrata*'s specific adaptation to the human host. The gene with the highest  $d_N/d_S$   
59 ratio (3.40) among them is *CgMIP1*, an orthologue of a mitochondrial DNA (mtDNA) polymerase in  
60 *S. cerevisiae* (Gabaldon et al., 2013).

61 mtDNA encodes subunits of the respiratory complexes, which are involved in the production of ATP  
62 during oxidative phosphorylation. The consequences of mtDNA loss have been well described in  
63 *S. cerevisiae* and *C. glabrata*, which, unlike other pathogenic yeasts such as *C. albicans* or *Cryptococcus*  
64 *neoformans* (Chen & Clark-Walker, 2000; Toffaletti, Nielsen, Dietrich, Heitman, & Perfect, 2004), are  
65 known as *petite*-positive yeasts. The *petite* phenotype due to loss of mitochondrial function is  
66 characterized by the namesake small colonies, slow growth, inability to use non-fermentable carbon  
67 sources, the activation of the transcription factor *PDR1*, and the upregulation of its targets *CDR1* and  
68 *CDR2*, which code for ABC efflux pump transporters (Chen & Clark-Walker, 2000). This upregulation  
69 confers high resistance to azole antifungals (Brun et al., 2004; Sanglard, Ischer, & Bille, 2001; Zhang &  
70 Moye-Rowley, 2001). Indeed, the *petite* phenotype can be obtained by incubation with high  
71 concentrations of azole or ethidium bromide (Bouchara et al., 2000; Goldring, Grossman, Krupnick,  
72 Cryer, & Marmur, 1970; Sanglard et al., 2001). Ethidium bromide is known to inhibit mtDNA synthesis  
73 and degrade the existing mtDNA (Goldring et al., 1970), but how azoles trigger mitochondria dysfunction  
74 is not entirely clear. Azole treatment is known to trigger a temporary loss of mitochondria function (Kaur,  
75 Castano, & Cormack, 2004), and the few clinical *petite* strains of *C. glabrata* described so far have been  
76 mainly isolated from azole-treated patients (Bouchara et al., 2000; Posteraro et al., 2006). One of these  
77 isolates has been further characterized (Ferrari, Sanguinetti, De Bernardis, et al., 2011). Surprisingly,  
78 these slow growing isolates showed increased virulence in an animal infection model (Ferrari,  
79 Sanguinetti, De Bernardis, et al., 2011). However, when its parental strain was made *petite* by ethidium  
80 bromide treatment, its virulence was instead reduced. The same was found in another study using an  
81 ethidium bromide-induced *petite* (Brun et al., 2005). Thus, the clinical relevance of the *petite* form is still  
82 unclear, and its identification from patient samples may be even hindered by its long generation time.

83 This study investigates the relevance of the presence and absence of mitochondrial function for  
84 *C. glabrata*'s adaptation to the host and its pathogenic potential, as well as potential role *CgMIP1* for  
85 switching between *petite* and non-*petite* phenotypes. Deletion of *MIP1* results in *petite* forms, but in  
86 contrast to the *S. cerevisiae Scmip1Δ* mutant, *C. glabrata Cgmip1Δ* survives phagocytosis by  
87 macrophages significantly better than wild type cells. Importantly, the *C. glabrata petite* phenotype is

88 directly induced in wild type strains by phagocytosis and leads to increased azole resistance, but also *vice*  
89 *versa*, with azole-induced *petites* resisting phagocytosis better. This indicates a clinically important  
90 positive feedback between two relevant phenotypes: resistance to macrophages and azoles. The clinical  
91 relevance of this phenomenon was further corroborated by the detection of a number of *petite* strains in  
92 clinical samples.

## 93 RESULTS

### 94 ***MIP1* knock-out mutants of *C. glabrata* and *S. cerevisiae* both show *petite* phenotypes but differ in** 95 **their survival after phagocytosis.**

96 Since the *MIP1* gene of *C. glabrata* seems to have been under selective pressure during the pathogen's  
97 evolution, we investigated its functions in virulence-related scenarios. First, we created a deletion  
98 mutant of *CgMIP1* (*Cgmip1Δ*) and compared it to a similar deletion of the orthologous gene in  
99 *S. cerevisiae* (*Scmip1Δ*). *ScMIP1* is known to encode a mitochondrial polymerase (Saccharomyces  
100 Genome Database (SGD), [www.yeastgenome.org](http://www.yeastgenome.org)) and therefore, we first checked whether the mutants  
101 show the *petite* phenotype. As expected, both *Cgmip1Δ* and *Scmip1Δ* showed phenotype typical for  
102 *petite* variants (Brun et al., 2004; Sanglard et al., 2001; Zhang & Moye-Rowley, 2001): small colonies on  
103 agar plates and absence of reductive mitochondrial power, absence of mtDNA, and lack of growth in  
104 non-fermentable carbon sources (Figure 1). Moreover they showed high expression of the efflux pumps-  
105 related genes *PDR1* and *CDR1* (*PDR1* and *PDR5* in *S. cerevisiae*) and high resistance to azoles, again  
106 typical for *petite* variants (Figure 1). These results therefore show that, like its *S. cerevisiae* counterpart,  
107 *CgMIP1* likely encodes a mitochondrial DNA polymerase, and its deletion triggers loss of mtDNA, loss of  
108 mitochondrial function, and a *petite* phenotype in both species.

Figure 1

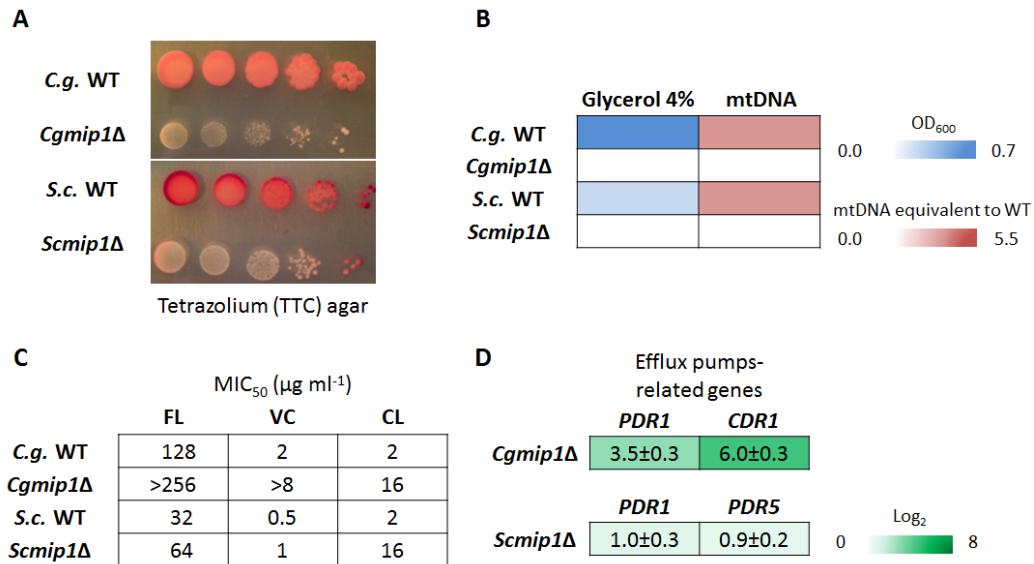

109

110 **Figure 1. Both *Cgmip1Δ* and *Scmip1Δ* show typical *petite* phenotypes. (A) Small colonies and loss of**  
 111 **mitochondrial reductive power, as indicated by lack of tetrazolium dye reduction, (B) lack of growth in**  
 112 **alternative carbon sources like glycerol and absence of mitochondrial (mt) DNA as determined by optical**  
 113 **density and qPCR (n=3 for each type of experiment, color by mean), (C) high resistance to azoles,**  
 114 **including fluconazole (FL), voriconazole (VC), and clotrimazole (CL), and (D) overexpression of efflux**  
 115 **pumps-related genes (mean ± SD, n=3 independent experiments with 3 technical replicates each).**

116 To study a possible involvement of *MIP1* in processes relevant for virulence, we subjected *Cgmip1Δ* to  
 117 phagocytosis by human monocyte-derived macrophages (hMDMs) and analyzed its survival after three  
 118 and six hours. At those time points, macrophages were lysed, and total colony forming units (CFU) were  
 119 counted after plating on YPD agar. A significantly higher survival rate of *Cgmip1Δ* was found at both  
 120 times compared to both the wild type control and to *Scmip1Δ* (Figure 2). In order to confirm that this  
 121 increased number of surviving intracellular yeasts was indeed due to better survival and not due  
 122 differences in phagocytosis rate or internal replication, we measured both parameters. For phagocytosis  
 123 rates, *Cgmip1Δ* and wild type were incubated with hMDMs for 1 hour and CFUs from supernatant and  
 124 macrophage lysate were determined. *Cgmip1Δ* cells were taken up at a slightly higher rate as compared  
 125 to the wild type (Figure 2), which, however, alone cannot explain the stark increase in the number of  
 126 intracellular *Cgmip1Δ* especially at six hours: Whereas the *petite* mutant is taken up 1.5 times more than

127 the wild type, the survival of this mutant is up to four times more than the wild type after 3 hours, and  
128 six times more at 6 hours.

129 To gain more insight into the underlying reason for this slightly increased uptake of *Cgmip1Δ*, the  
130 exposure of cell wall components was measured by flow cytometry. Significantly higher exposure of  
131 mannan and chitin was observed (Figure 2), while exposure of  $\beta(1\rightarrow3)$ -Glucan was slightly reduced.  
132 Higher surface mannan levels on yeast cells are known to increase phagocytosis rate (Keppler-Ross,  
133 Douglas, Konopka, & Dean, 2010), and thus, our results show that mitochondria dysfunction by deletion  
134 of *CgMIP1* affects cell wall composition in *C. glabrata* – in agreement with previous observations (Batova  
135 et al., 2008; Brun et al., 2005) – and leads to changes in the phagocytosis rate. To also directly measure  
136 fungal replication within the macrophages, yeasts were FITC-stained and incubated with hMDMs for six  
137 hours. This stain is not transferred to daughter cells, and we measured FITC-negative cells in the  
138 macrophage lysate by flow cytometry and also visualized them with fluorescence microscopy. According  
139 to our FACS data, *Cgmip1Δ* showed a much lower replication rate than its parental strain, and we did not  
140 observe any unstained daughter cells by microscopy. This is in accordance with the nutrient limitation in  
141 the phagosome, where only non-fermentable (and therefore *petite*-inaccessible) carbon sources  
142 (carboxylic acids, amino acids, peptides, N-acetylglucosamine, and fatty acids) are thought to be  
143 available (Gilbert, Wheeler, & May, 2014; Lorenz, Bender, & Fink, 2004; Sprenger, Kasper, Hensel, &  
144 Hube, 2018).

145 These results indicate that, although *Cgmip1Δ petite* phenotype is engulfed faster and is largely unable  
146 to replicate inside the macrophage, it is killed significantly slower in the first hours of immune cell  
147 interaction, in clear contrast to non-pathogenic *S. cerevisiae*.

**Figure 2**

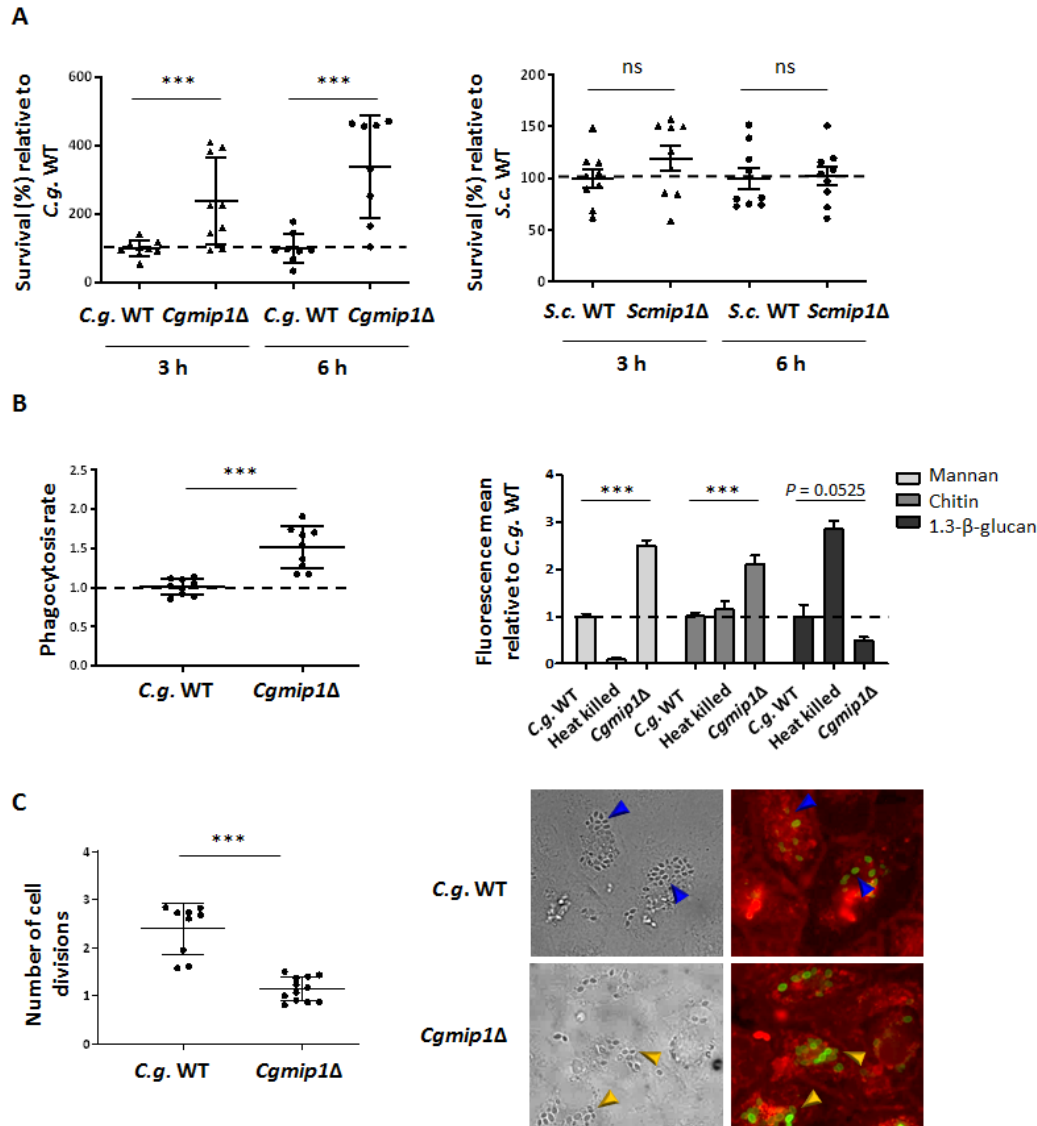

148

149 **Figure 2. *C. glabrata* and *S. cerevisiae* petite phenotypes differ in their survival after phagocytosis. (A)**

150 *Cgmip1Δ* survives phagocytosis by hMDMs much better than its parental wild type at early time points

151 up to 6 hours – in contrast to *Scmip1Δ*, which does not show any change in survival compared to its wild

152 type (mean ± SD, n=9 with 3 different donors in 3 independent experiments, each point represents the

153 mean of 3 technical replicates). **(B)** *Cgmip1Δ* is taken up at a higher rate than the wild type by

154 macrophages (mean ± SD, n=9 with 3 different donors in 3 independent experiments, each point

155 represents the mean of 3 technical replicates), and its accessible cell wall structures differ from the wild

156 type (mean ± SD, n=3 independent experiments with 3 technical replicates each). **(C)** In contrast to the

157 wild type, *Cgmip1Δ* does not replicate within the phagosome as shown by FACS (left) and by the lack of  
158 FITC-unstained daughter cells (right). These are present in the wild type (blue arrows) contrary to the  
159 mutant, which shows only mother cells (yellow arrows) (representative picture shown). Quantitative  
160 data is mean  $\pm$  SD, n=12 with 3 different donors in 4 independent experiments, each point represents the  
161 mean of 3 technical replicates. (A-C) Statistically significantly different values (unpaired, two-tailed  
162 Student's t-test on log-transformed ratios) are indicated by asterisks as follows: \*\*\*,  $p \leq 0.001$ .

### 163 **The *Petite* phenotype emerges from the wild type after phagocytosis.**

164 Our data so far indicates a selective advantage of the *petite CgMIP1* deletion strain during initial  
165 interactions with macrophages, despite its inability to replicate within these cells. We therefore analyzed  
166 survival of *Cgmip1Δ* and the wild type during long-term residence within macrophages. For this  
167 experiment, yeasts were first incubated with macrophages for three hours, the supernatant was  
168 removed and the yeast-containing macrophages were then incubated for 7 days. Fungal survival was  
169 assessed by CFU counting from plated lysate at 3 hours, 1 day, 4 days, and 7 days. *Cgmip1Δ* again  
170 showed higher survival up to one day of co-incubation, in full support of our previous results (Figure 3).  
171 However, at later time points, *Cgmip1Δ* showed a significant decrease in survival. This may be explained  
172 by its inability to replicate within the phagosome, leading to a long-term disadvantage. Unexpectedly,  
173 during incubation of the wild type, we spotted small colonies at all time points, especially after three  
174 hours and one day (the time points with the best survival of the *petite* strain), with an average frequency  
175 of  $1.5 \times 10^{-2}$  after 1 day (Figure 3). These colonies showed stable small colony formation and lack of  
176 growth in glycerol, typical features of *petite* phenotype. Importantly this frequency was higher than the  
177 spontaneous emergence of *petite* without macrophages at the same time points (Figure 3). In addition,  
178 some of the colonies which did not grow in glycerol gave rise to respiratory-competent phenotype – *i. e.*  
179 returned to their original non-*petite* state – when they were plated again on complex media, with an  
180 observed frequency of  $5.6 \times 10^{-2}$ .

181 We analyzed several of the stable wild type-derived *petite* colonies and found – in the majority, but not  
182 all of them – a lack of detectable mtDNA. We selected three colonies from different experiments for  
183 further characterization of their *petite* phenotype (Figure 3). These lacked functional mitochondria as  
184 well as mtDNA and, importantly, also showed high azole resistance with constitutive expression of efflux-  
185 pumps related genes, similar to *Cgmip1Δ* (Figure 3).



186 We hypothesized that phagosomal ROS production may have contributed to the loss of mitochondrial  
187 function (Guo, Sun, Chen, & Zhang, 2013; Qin, Liu, Cao, Li, & Tian, 2011). We therefore incubated wild  
188 type yeasts in RPMI medium with sublethal concentration (10mM) of H<sub>2</sub>O<sub>2</sub> for 24 hours and observed  
189 emergence of small colonies at a low frequency, which did not grow in glycerol (data not shown).  
190 These results indicate that *petite* phenotype is adaptive within macrophages at early time points, but not  
191 at later times, probably due to the long period of starvation in the phagosome that prevents it to  
192 replicate. In agreement with this presumable advantage, *petite* phenotypes arise from the respiratory-  
193 competent yeasts after three hours to one day of phagocytosis, the same time period in which *Cgmip1Δ*  
194 shows a higher fitness. Importantly, we also found that the macrophage-induced *petites* can revert to a  
195 respiratory metabolisms when grows again in absence of stress.

Figure 3

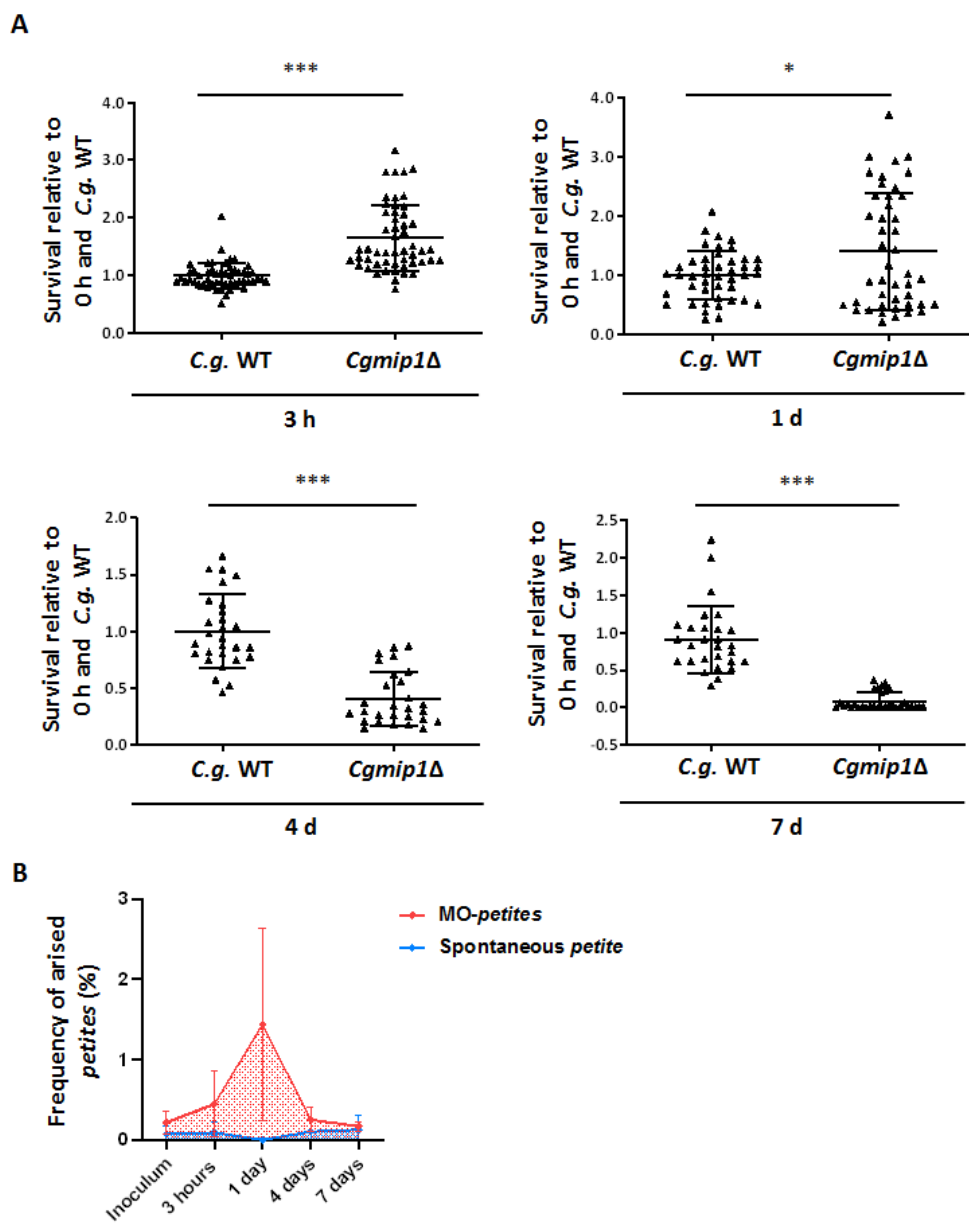

**Figure 3**

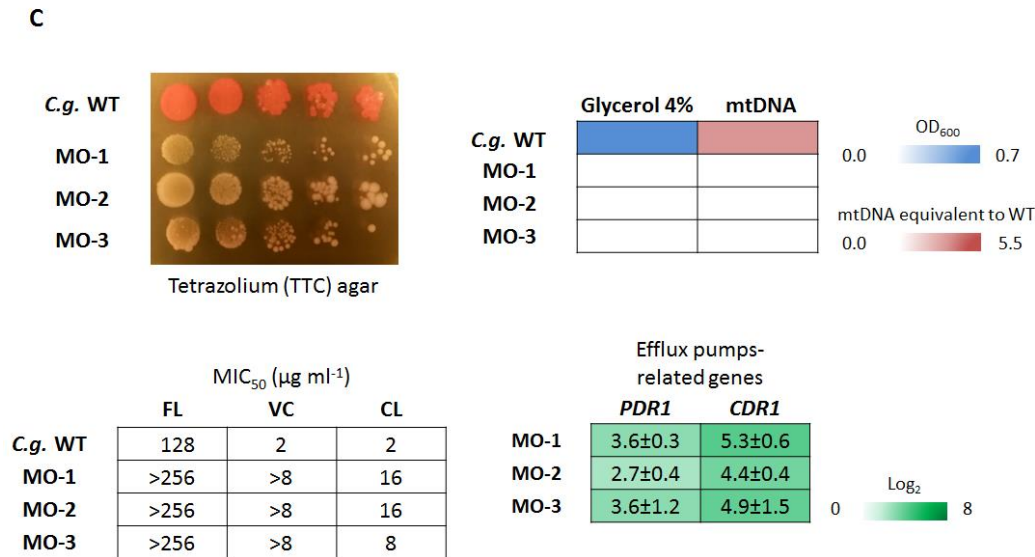

197  
 198 **Figure 3. The *Petite* phenotype emerges from the wild type after phagocytosis. (A) *Cgmip1Δ* shows**  
 199 **higher survival up to one day of co-incubation, but loses this advantage over extended periods of**  
 200 **intracellular existence (n=5 with 1 different donor in each of the 5 independent experiments, each point**  
 201 **represents a single survival test). (B) Cells with *petite* phenotypes arise from the wild type during co-**  
 202 **incubation with hMDMs (red) at a much higher rate than the spontaneous appearance of *petite* in RPMI**  
 203 **(blue). The time points with the highest frequency of *petite* emergence correspond to the time point of**  
 204 **increased fitness of *Cgmip1Δ* during phagocytosis (Red: n=5 with 1 different donor in each of the 5**  
 205 **independent experiments and 4 technical replicates each. Blue: n=3 in 3 different experiments with 6**  
 206 **technical replicates. Mean ± SD of the frequencies of *petite* emergence at each time point). (C)**  
 207 **Phenotype characterization reveals the hMDMs-derived strains (MO-1 to -3) to be indeed *petite*. From**  
 208 **up-left: Small colony forming and lack of mitochondrial reductive power, lack of growth in alternative**  
 209 **carbon sources, absence of mitochondrial (mt) DNA, high resistance to azoles (all n=3 with mean values**  
 210 **or representative picture shown) and overexpression of efflux pumps-related genes (mean ± SD, n=3**  
 211 **independent experiments with 3 technical replicates each). FL: Fluconazole, VC: Voriconazole and CL:**  
 212 **Clotrimazole. (A) Statistically significantly different values (unpaired, two-sided Student's t-test on log-**  
 213 **transformed ratios) are indicated by asterisks as follows: \*, p ≤ 0.05; \*\*\*, p ≤ 0.001.**

214 **The *Petite* phenotype triggered by fluconazole increases survival of phagocytosis at early time points.**

215 It is known that azoles trigger (often temporary) mitochondrial dysfunction in *C. glabrata* (Kaur et al.,  
216 2004; Shingu-Vazquez & Traven, 2011) which leads to fluconazole resistance through the upregulation of  
217 the efflux pump genes *CDR1* and *CDR2*, with the former being especially important in this resistance  
218 (Brun et al., 2004; Sanglard et al., 2001; Zhang & Moye-Rowley, 2001). In fact, *petite* mutants have very  
219 occasionally been isolated from patients undergoing fluconazole treatment (Bouchara et al., 2000;  
220 Posteraro et al., 2006). Since our results showed an advantage of the genetically created *petite* strains  
221 after phagocytosis, we wondered whether fluconazole-induced *petites* share the same increased fitness.  
222 We therefore incubated wild type yeasts for 8 h in RPMI media with 8 µg/ml of fluconazole, half the  
223 concentration of the reported MIC<sub>50</sub> for *C. glabrata* ("The European Committee on Antimicrobial  
224 Susceptibility Testing. Breakpoint tables for interpretation of MICs for antifungal agents.," 2020). Again,  
225 we observed the appearance of small colonies with a *petite* phenotype (Figure 4). When these strains  
226 were co-incubated with macrophages for three and six hours, all fluconazole-induced *petites* showed  
227 better survival in macrophages at both time points (Figure 4).  
228 These results indicate a cross-resistance of the *petite* phenotype induced by and also protecting from  
229 both, phagocytosis and fluconazole: exposure to fluconazole triggers a higher fitness of *C. glabrata* inside  
230 macrophages and *vice versa*, fluconazole-resistant yeasts appear within macrophages.

## Figure 4

A

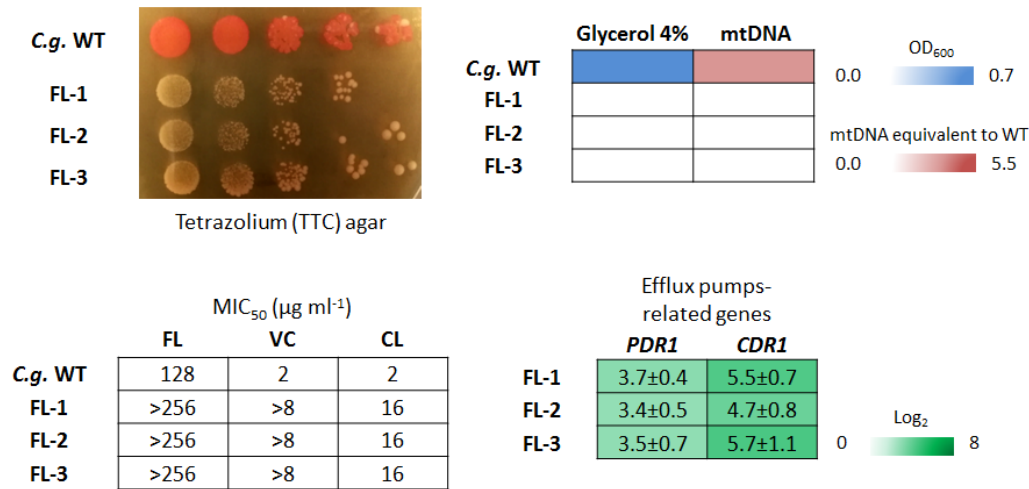

B

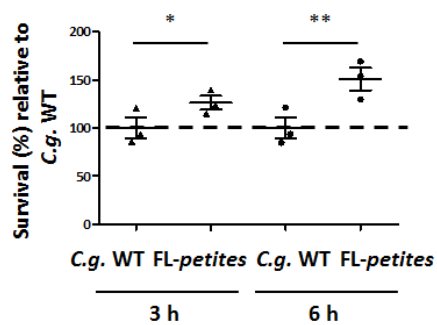

231

232 **Figure 4. The *petite* phenotype triggered by fluconazole increases survival of phagocytosis at early time**

233 **points. (A)** Fluconazole-induced *petites* show *petite* phenotype similar to *Cgmip1Δ*: Small colonies and

234 lack of mitochondrial reductive power, lack of growth in alternative carbon sources, absence of

235 mitochondrial (mt) DNA, high resistance to azoles (all n=3 with mean values or representative picture

236 shown), and overexpression of efflux pumps-related genes (mean ± SD, n=3 independent experiments

237 with 3 technical replicates each). FL: Fluconazole, VC: Voriconazole and CL: Clotrimazole. **(B)** Fluconazole-

238 induced *petites* (FL-1 – FL-3) show better survival of phagocytosis at early time points (mean ± SD, n=3

239 with 1 donor in 3 independent experiments, each point represents a mean of 3 different colonies per

240 donor, and each colony has 3 technical replicates). Statistically significantly different values (unpaired,

241 two-sided Student's t-test on log-transformed ratios) are indicated by asterisks as follows: \*, p ≤ 0.05; \*\*,

242 p ≤ 0.01.

243 ***Cgmip1Δ* shows higher basal expression of stress response-related genes and grows better under ER**  
244 **stress.**

245 To understand why switching to a *petite* phenotype increases intraphagosomal fitness, we measured the  
246 basal and induced expression of different stress-response genes and tested the resistance to infection-  
247 related stresses. *Cgmip1Δ* and the macrophages- and fluconazole-derived *petite* strains showed an  
248 increased basal expression of a range of environmental stress response genes (*HSP12*, *HSP42*, and *SGA1*)  
249 and cell wall stress-related genes encoding yapsins (*YPS1*, *YPS10*, and *YPS8*) (Figure 5). These genes have  
250 been shown to be highly up-regulated in the *petite* isolate BPY41, and may be involved in its  
251 hypervirulence (Ferrari, Sanguinetti, De Bernardis, et al., 2011). The yapsin *YPS* gene family has been  
252 implicated in the survival inside macrophages (Kaur, Ma, & Cormack, 2007), and we found that while the  
253 three *YPS* genes were up-regulated in *C. glabrata*, in the *S. cerevisiae petite* mutant (which does not  
254 survive phagocytosis better than its wild type) the most similar yapsin genes (*YPS1* and *MKC7*) showed  
255 no increased basal transcript levels (Figure S1).

256 We then tested *Cgmip1Δ* in different *in vitro* stress conditions (data not shown). Interestingly, *Cgmip1Δ*  
257 showed oxidative stress resistance comparable to the wild type (Figure S1), in contrast to mitochondrial  
258 mutants of *S. cerevisiae* that are known to be especially sensitive to H<sub>2</sub>O<sub>2</sub> (Thorpe, Fong, Alic, Higgins, &  
259 Dawes, 2004). Therefore we discarded a decreased sensitivity to oxidative stress as a possible  
260 explanation for the higher survival of *Cgmip1Δ* within macrophages. However *Cgmip1Δ* and the azole-  
261 and macrophage-induced *C. glabrata petites* showed better growth than their wild type under ER stress  
262 conditions (Figure 5). Since efflux pumps play a central role in azole resistance, we analyzed mutants  
263 lacking their main transcriptional activator Pdr1 (Caudle et al., 2011; Thakur et al., 2008) in both, the wild  
264 type (*pdr1Δ*) and the *Cgmip1Δ* (*Cgmip1Δ+pdr1Δ*) background. As expected, both mutants grew poorly in  
265 increasing concentrations of fluconazole (Figure S1). However, under ER stress, the double mutant  
266 (lacking *CgMIP1* and *CgPDR1Δ*) still exhibited significantly better growth than the single mutant and the  
267 wild type (Figure S1), showing that the *Cgmip1Δ* resistance cannot be solely dependent upon Pdr1-  
268 regulated pathways or functions. Evidently, additional resistance mechanisms exist in the *petite*  
269 phenotype. In agreement with these results, the double mutant *Cgmip1Δ+pdr1Δ* showed significantly  
270 higher survival than the wild type after phagocytosis by hMDMs, whereas a *pdr1Δ* single mutant was  
271 actually killed more. Thus, the Pdr1 pathway seems to be involved in stress resistance and macrophage  
272 survival of these strains, but this cannot be the sole underlying mechanism (Figure S1).

273 Overall, these results show that *petite* strains possess a constitutively active detoxifying response that,  
 274 together with the overexpression of efflux pumps, confers ER stress resistance (in addition to azole  
 275 resistance) and could explain the higher fitness within the phagosome observed at early time points.

**Figure 5**

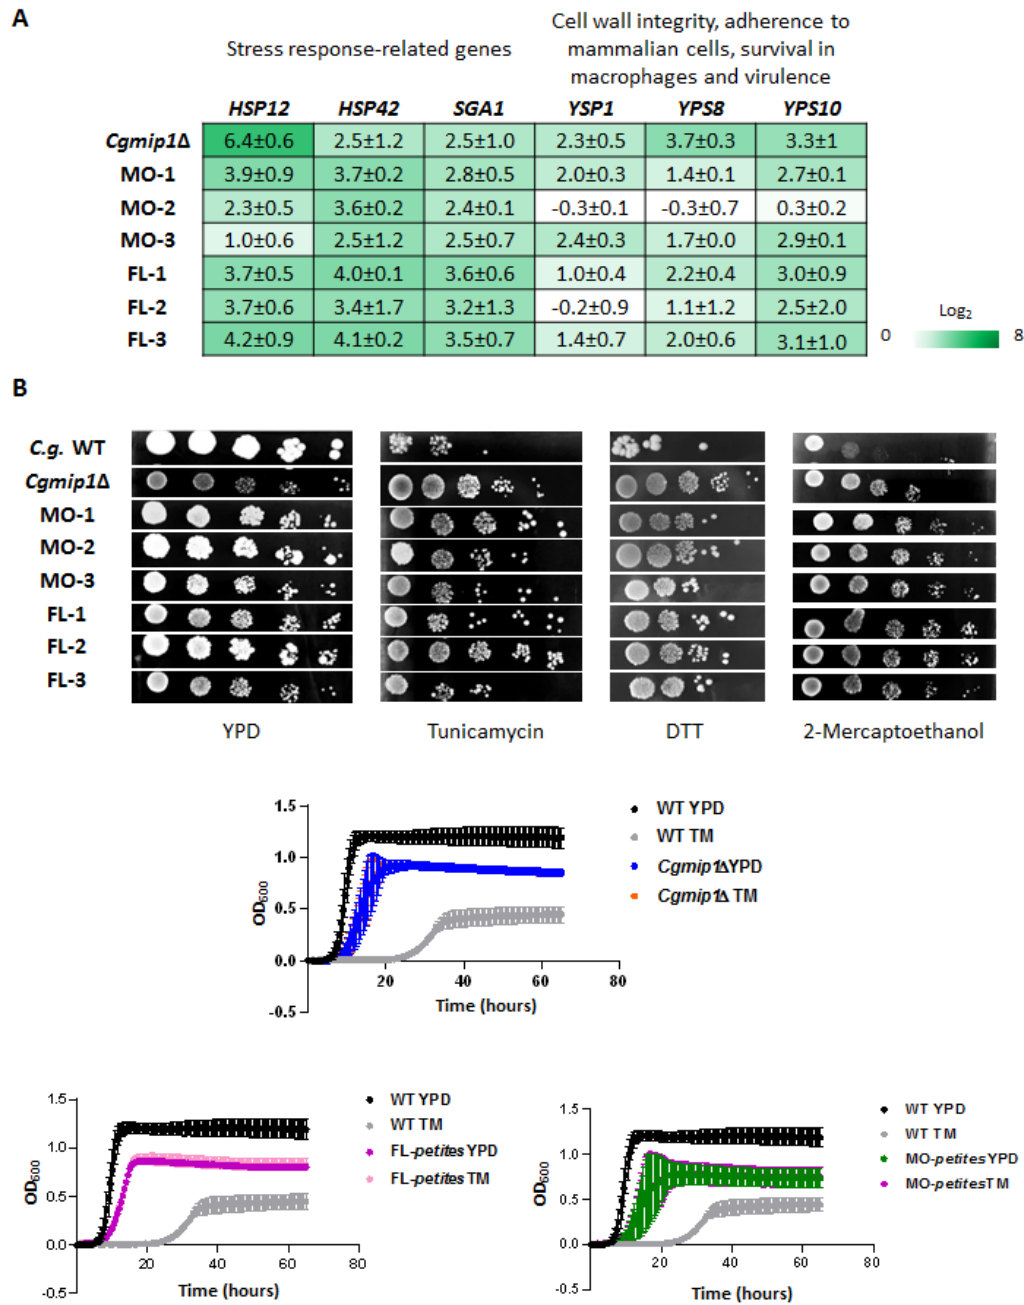

276

277 **Figure 5. *Cgmip1Δ* shows higher basal expression of stress response-related genes and grows better**  
 278 **under ER stress. (A)** *Petite* variants of *C. glabrata* show high constitutive expression of stress-response  
 279 genes even under non-stressed conditions (YPD) (mean ± SD, n=3 independent experiments with 3  
 280 technical replicates each), and **(B)** exhibit better growth than their wild type under different ER stresses  
 281 on plates as well as with tunicamycin (TM) in liquid cultures (Mean ± SD, n=3 independent experiments  
 282 or representative picture shown); FL-1 – FL-3: Fluconazole-induced *petites*; MO-1 – MO-3 macrophage-  
 283 derived *petites*.

Figure S1

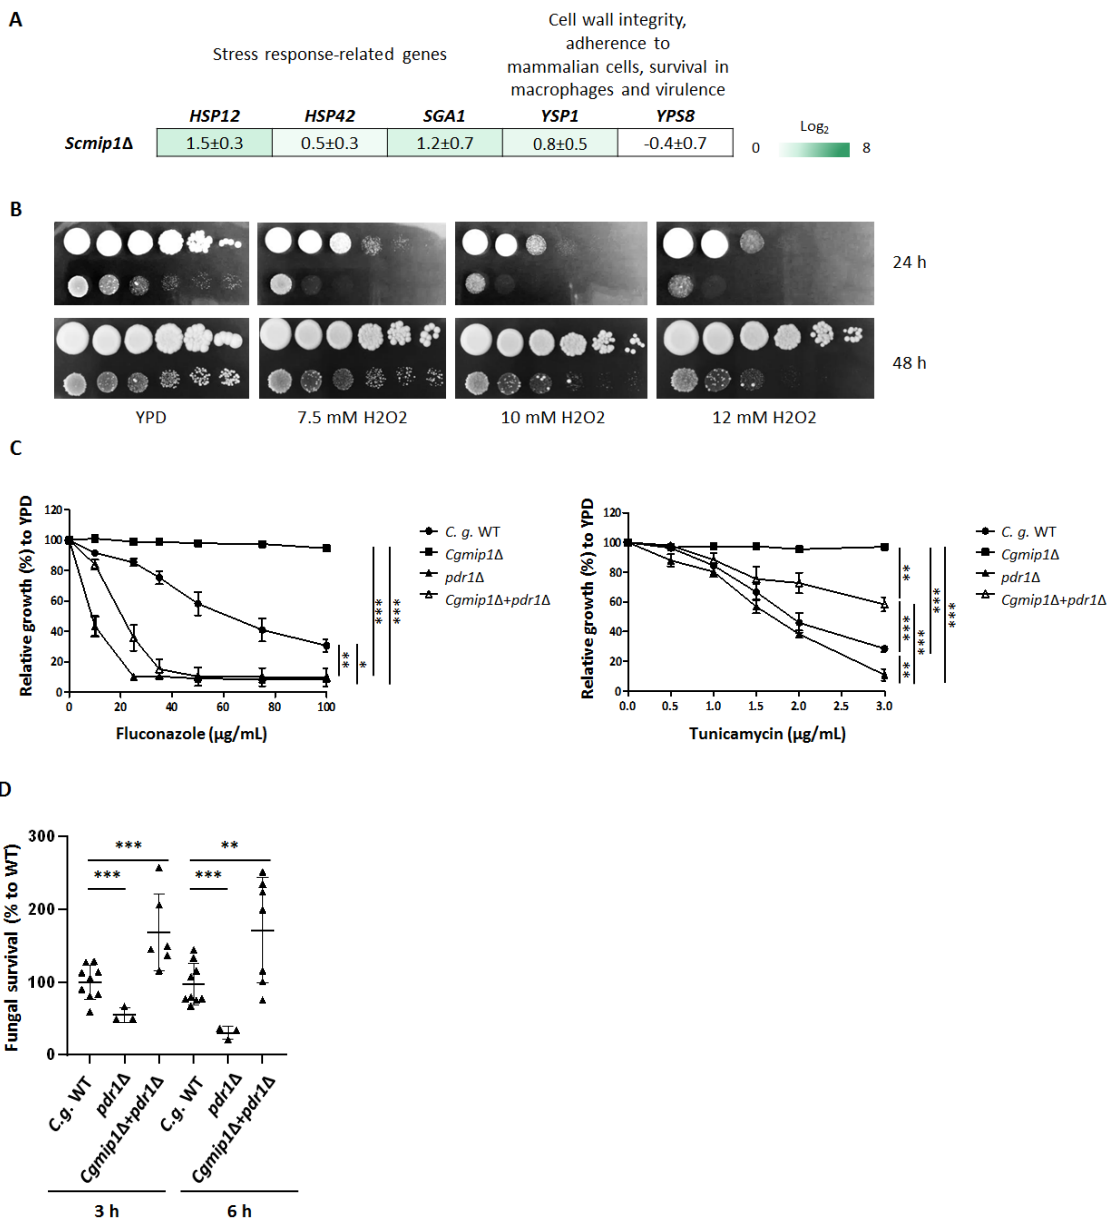

284

285



286 **Figure S1. *YPS* genes and a *PDR1* pathway seem to be involved in the high survival to phagocytosis and**  
287 **ER stress resistance of *petite* phenotype. (A) *Scmip1Δ* does not show high constitutive expression of its**  
288 **orthologues of the *YPS* genes (*YPS1* and *MKC7* orthologue to *YPS8* in *C. glabrata*) (mean ± SD, n=3**  
289 **independent experiments with 3 technical replicates each). (B) *Cgmip1Δ* shows a wild type-like level of**  
290 **resistance to oxidative stress (H<sub>2</sub>O<sub>2</sub>) on agar plates (representative picture shown). (C) The Pdr1 pathway**  
291 **seems to contribute to ER stress resistance but is not the solely responsible (mean ± SD, n=3**  
292 **independent experiments with 3 technical replicates each) and (D) survival to phagocytosis by *pdr1Δ***  
293 **single mutant and *Cgmip1Δ+pdr1Δ* double mutant (mean ± SD, n=6 with 2 different donors in 3**  
294 **independent experiments, each point represents the mean of 3 technical replicates). Statistically**  
295 **significantly different values (C: One-way ANOVA and Tukey's test, D: unpaired two-sided Student's t-test**  
296 **on log-transformed ratios) are indicated by asterisks as follows: \*, p ≤ 0.05; \*\*, p ≤ 0.01; \*\*\*, p ≤ 0.001.**

297 **The *Cgmip1Δ* *petite* phenotype is adaptive under infection-like conditions but not in commensalism.**

298 We proposed that the generally reduced growth of *petite* mutants will be disadvantageous when  
299 competing with other microorganisms in a commensal environment, such as the human gut or vagina.  
300 Therefore, we wondered whether the emergence of *petite* phenotype may only be adaptive under  
301 infection-like conditions, such as antifungal treatment with azoles. To test this, we incubated separately  
302 or simultaneously wild type and *Cgmip1Δ* in the presence of vaginal cells and *Lactobacillus rhamnosus*  
303 for 24 hours mimicking a commensal-like situation (Graf et al., 2019), either in the absence or the  
304 presence of 8 µg/ml fluconazole. This fluconazole level is three times the concentration reported in  
305 vaginal fluids after a single oral dose (Houang, Chappatte, Byrne, Macrae, & Thorpe, 1990), but a  
306 concentration half lower than the MIC<sub>50</sub> for *C. glabrata* ("The European Committee on Antimicrobial  
307 Susceptibility Testing. Breakpoint tables for interpretation of MICs for antifungal agents.," 2020). As  
308 expected, we observed only 60% of the wild type CFUs for the *petite* strain when it was incubated alone  
309 with human epithelial cells and without antifungals after 24 hours (Figure 6). The relative growth of  
310 *Cgmip1Δ* was further reduced in the presence of lactobacilli, and even more when co-incubated with the  
311 wild type and bacteria (Figure 6). However, the *petite* strain massively out-competed the wild type when  
312 fluconazole was present (Figure 6). Surprisingly, we did not observe a reduction in relative *Cgmip1Δ* CFUs  
313 in presence of both, lactobacilli and fluconazole, as it was seen when both species grew together in the  
314 absence of the drug.

315 In conclusion, these results show how in commensal-like and non-treated conditions *Cgmip1Δ* is  
 316 outcompeted by respiratory-competent yeast cells and is also less able to compete with commensal  
 317 bacteria. We conclude that this phenotype likely emerges only under conditions where it is  
 318 advantageous, and then exists only transiently. These conditions include fluconazole treatment, but also  
 319 uptake by macrophages.

**Figure 6**

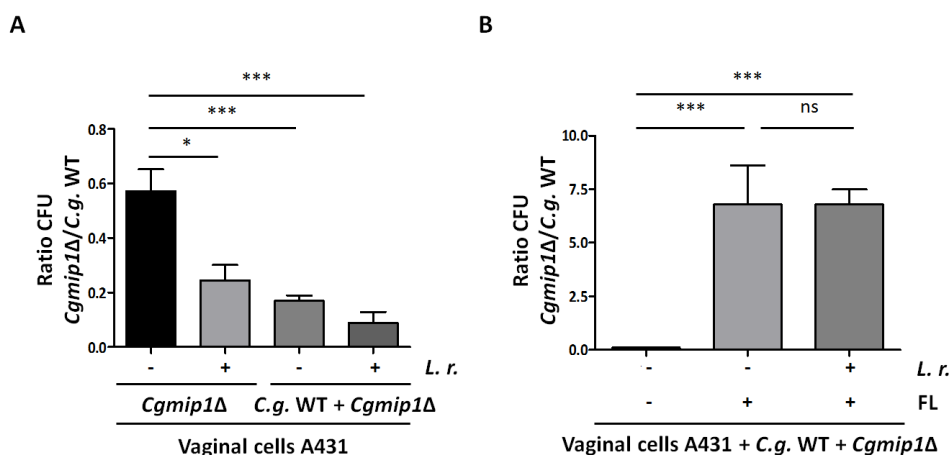

320  
 321 **Figure 6. *Cgmip1Δ petite* phenotype is adaptive under infection-like conditions but not in commensal-**  
 322 **like conditions. (A)** The ratio of recovered *CgMIP1*-deleted to wild type *C. glabrata* cells is low when they  
 323 were incubated separately on vaginal cells (*Cgmip1Δ*-). The presence of *Lactobacillus rhamnosus* (*L. r.*)  
 324 further shifts that ratio toward a lower recovery of *Cgmip1Δ*, and these effects are exacerbated in a  
 325 direct competition in the same wells (*C. g. WT + Cgmip1Δ*). Data shown is mean  $\pm$  SD, n=3 independent  
 326 experiments. **(B)** In an infection model in the presence of fluconazole (FL) the effect is inverted. Without  
 327 fluconazole, *Cgmip1Δ* is outcompeted as before (note the scale), but it has a decisive advantage in the  
 328 presence of the antifungal drug, independent of the commensal bacteria (mean  $\pm$  SD, n=3 independent  
 329 experiments). **(A-B)** Statistically significantly different values (unpaired, two-sided Student's t-test on log-  
 330 transformed ratios) are indicated by asterisks as follows: \*,  $p \leq 0.05$ ; \*\*\*,  $p \leq 0.001$ .

331 **The *Cgmip1Δ petite* phenotype is found in clinical strains.**

332 Our data so far indicate that the *petite* phenotype should only appear transiently or at low rates in  
 333 patients, but then provide significant advantages by increasing resistance to phagocytes and antifungals.

334 We therefore screened two collections of 146 clinical *C. glabrata* isolates in total, provided by two  
335 different laboratories. Sixteen strains were identified as *petite*, i.e. they were showing a small colony  
336 size, absence of mitochondrial reductive power, and no growth in alternative carbon sources (Figure S2).  
337 The only common clinical characteristic these strains show is that majority of them was isolated from  
338 patients with underlying diseases (Table S1). These strains showed absence (but also sometimes even  
339 higher amounts) of mtDNA fragment we screened for. Furthermore, like our experimentally created  
340 *petites*, they exhibited high resistance to azoles, although they had not been exposed to azole treatment  
341 (Table S1), and grew better under ER stress compared to the wild type (Figure S2). Lastly, like the other  
342 *petite* variants, the clinical *petites* generally showed a higher survival inside of macrophages at early time  
343 points compared to the wild type (Figure S2). These results indicate that *petite* mutant can emerge  
344 during *C. glabrata* infections *in vivo* in clinical settings, and that these exhibit all the resistances we found  
345 in the experimentally created *petite* strains.

Figure S2

A

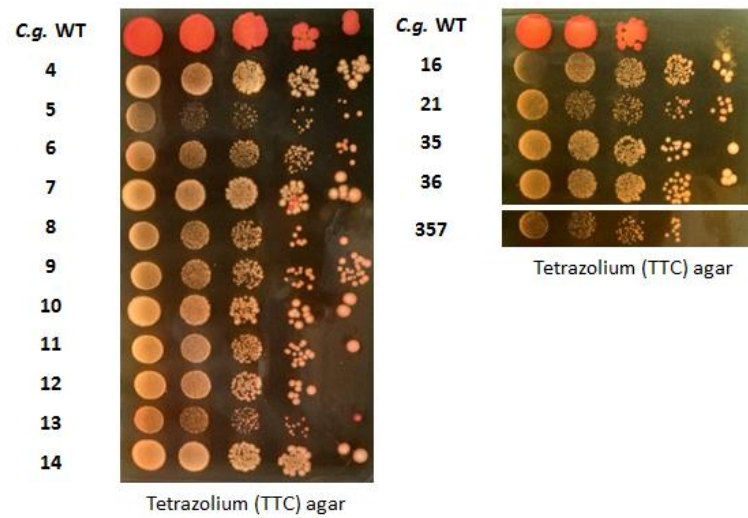

B

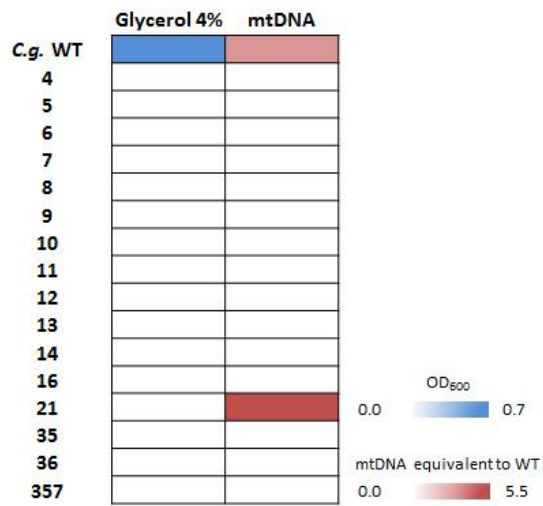

C

|                | MIC <sub>50</sub> (μg ml <sup>-1</sup> ) |    |    |
|----------------|------------------------------------------|----|----|
|                | FL                                       | VC | CL |
| <i>C.g.</i> WT | 128                                      | 2  | 2  |
| <i>Cgmip1Δ</i> | >256                                     | >8 | 16 |
| 4              | +                                        | +  | +  |
| 5              | +                                        | +  | +  |
| 6              | +                                        | +  | +  |
| 7              | +                                        | +  | +  |
| 8              | -                                        | -  | -  |
| 9              | -                                        | -  | -  |
| 10             | +                                        | +  | +  |
| 11             | +                                        | +  | +  |
| 12             | +                                        | +  | +  |
| 13             | -                                        | -  | -  |
| 14             | -                                        | -  | -  |
| 16             | +                                        | +  | +  |
| 21             | +                                        | +  | +  |
| 35             | +                                        | +  | +  |
| 36             | +                                        | +  | +  |
| 357            | +                                        | +  | +  |

346

D

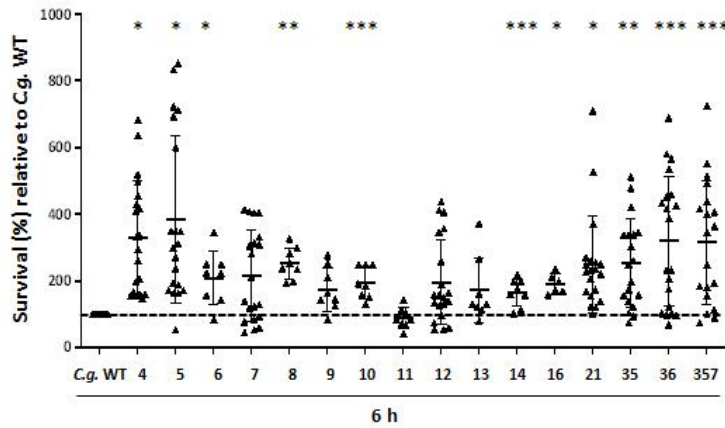

E

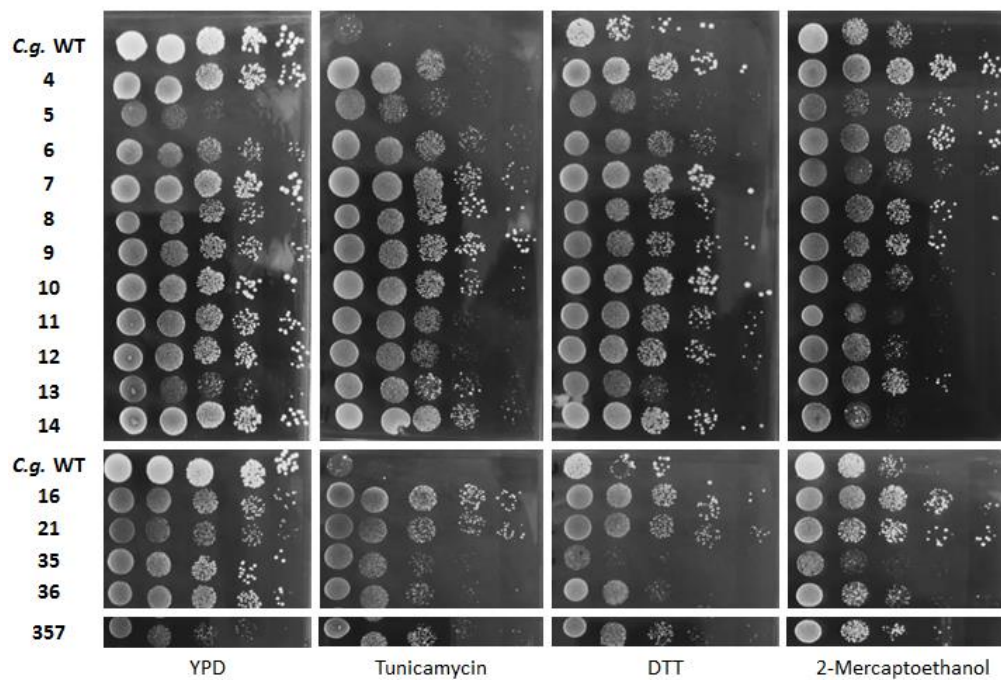

347

348 **Figure S2. *Cgmip1Δ* petite phenotype is found in clinical strains. (A)** The clinical *petite* variants show

349 formation of small colonies and lack mitochondrial reductive power (representative picture shown). **(B)**

350 None of them show growth in alternative carbon sources, and mostly absence of mitochondrial (mt) DNA

351 (mean of n=3 independent experiments). **(C)** Most clinical isolates were able to grow (+) at the increased

352 azole levels that indicated the resistance of the *petite* strains, which were generated *in vitro*. FL:

353 Fluconazole, VC: Voriconazole and CL: Clotrimazole. **(D)** Clinical isolates with *petite* phenotype show

354 increased survival to phagocytosis after 6 hours (mean  $\pm$  SD, n=4 with 2 different donors in 2

355 independent experiments, each point represents a single survival test). Statistically significantly different  
356 values (One-way ANOVA and Dunnett's test on log-transformed ratios) are indicated by asterisks as  
357 follows: \*,  $p \leq 0.05$ ; \*\*,  $p \leq 0.01$ ; \*\*\*,  $p \leq 0.001$ . **(E)** *Petite* clinical strains generally grow better under ER  
358 stress than the ATCC 2001 reference strain (representative picture shown).

359 **Table S1**

| Sample | Specimen                             | Sex    | Age   | Medical precondition                                                           | Disease                                                                                   | Immunosuppression               | Antifungal therapy |
|--------|--------------------------------------|--------|-------|--------------------------------------------------------------------------------|-------------------------------------------------------------------------------------------|---------------------------------|--------------------|
| 4      | urine sample                         | female | 50-55 | right heart failure with pulmonary hypertension                                | foreign body infection (atrial catheter with KNS) + pleural empyema ( <i>E. cloacae</i> ) | none                            | none               |
| 5      |                                      |        |       |                                                                                |                                                                                           |                                 |                    |
| 6      | urine sample                         | female | 50-55 | Endometriosis                                                                  | pyelonephritis with urosepsis                                                             | none                            | none               |
| 7      | blood culture                        | female | 35-40 | Crohn's disease                                                                | sigmaperforation mit peritonitis, <i>C. glabrata</i> candidemia                           | biologicals, cortison high dose | caspofungin        |
| 8      |                                      |        |       |                                                                                |                                                                                           |                                 |                    |
| 9      |                                      |        |       |                                                                                |                                                                                           |                                 |                    |
| 10     |                                      |        |       |                                                                                |                                                                                           |                                 |                    |
| 11     | expectorate                          | male   | 30-35 | cystic fibrosis                                                                | Exacerbation                                                                              | none                            | none               |
| 12     |                                      |        |       |                                                                                |                                                                                           |                                 |                    |
| 13     |                                      |        |       |                                                                                |                                                                                           |                                 |                    |
| 14     | urine (bladder catheter)             | female | 80-85 | cardiac bypass graft                                                           | compartment syndrome                                                                      | none                            | none               |
| 16     | punctate liverabscess                | female | 75-80 | pancreatic adenocarcinoma with arterial erusion                                | abdominal abscess with liver necrosis                                                     | chemotherapy                    | caspofungin        |
| 21     | abdominal punctate                   | male   | 80-85 | colon adenocarcinoma, asthma b.                                                | anastomotic leakage with adjunct peritonitis                                              | none                            | none               |
| 35     | sternocleidomastoid abscess membrane | male   | 50-55 | ARDS (acute respiratory distress syndrome) due to COVID 19, chronic bronchitis | cervical abscess due to <i>C. glabrata</i> and catheter related mycosis                   | none                            | caspofungin        |
| 36     |                                      |        |       |                                                                                |                                                                                           |                                 |                    |

360 **Table S1. Information about *petite* clinical strains of *C. glabrata* obtained from The Institute for Hygiene and Microbiology, Julius-Maximilians-**  
 361 **University.**

## 362 ***CgMIP1* sequencing of *petite* clinical isolates**

363 The fact that the mitochondrial polymerase gene *CgMIP1* shows a high value of positive selection  
364 ( $d_N/d_S=3.40$ ) during the diversification of *C. glabrata* as a species and the presence of *petite* strains in  
365 clinical isolates of *C. glabrata* led us to hypothesize that these two phenomena are connected. We  
366 therefore searched for mutations of *CgMIP1* by obtaining the genome sequences of fourteen clinical  
367 strains isolated from seven different patients, which thirteen were *petite* and one respiratory competent.  
368 As comparison, we used the reference *C. glabrata* strain ATCC 2001 and sixteen respiratory-competent  
369 clinical strains, whose genome sequences have been previously obtained (Carrete et al., 2018).  
370 Comparing to the wild type strain, we found different mutations along the *MIP1* gene sequence, but we  
371 did not observe a specific common mutation pattern for the *petite* strains (Figure 7). Furthermore, none  
372 of these mutations were found in the predicted polymerase or exonuclease domains, which are  
373 important for the function of the protein (Lodi et al., 2015). Interestingly, we found variations of the N-  
374 terminal mitochondrial targeting sequence, which we determined by TargetP 2.0. Twelve *petites* (98.3%)  
375 show insertions of up to three more amino acids in the positions 24S, 25M and 26L/R, in comparison to  
376 the respiratory-competent strains, from which only six contained such insertions (35.3%). Furthermore,  
377 we looked for similar mutations in other proteins with known or expected mitochondrial localization.  
378 Dss1 is an exonuclease of the mitochondrial degradosome, and *CAGL0K03047g* is an ortholog of the  
379 *S. cerevisiae* *ABF2* gene, which has a role in mtDNA replication. Like Mip1, both are essential for  
380 mitochondria biogenesis (Razew et al., 2018) and maintenance (Diffley & Stillman, 1991). Hem1 is  
381 localized in the mitochondrial matrix and required for heme biosynthesis in *S. cerevisiae*. Pgs1 is a  
382 mitochondrially localized proteins whose deletion leads to increased azole resistance (Batova et al.,  
383 2008), and Pup1 is a mitochondrial protein that is upregulated by Pdr1 in azole-resistant strains (Ferrari,  
384 Sanguinetti, Torelli, Posteraro, & Sanglard, 2011). We did not detect variability similar to Mip1's in any of  
385 these investigated protein sequence, independent on whether a well-defined mitochondrial transfer  
386 peptide was detectable (Abf2, Hem1) or not (Dss1, Pgs1, Pup1).



Figure 7

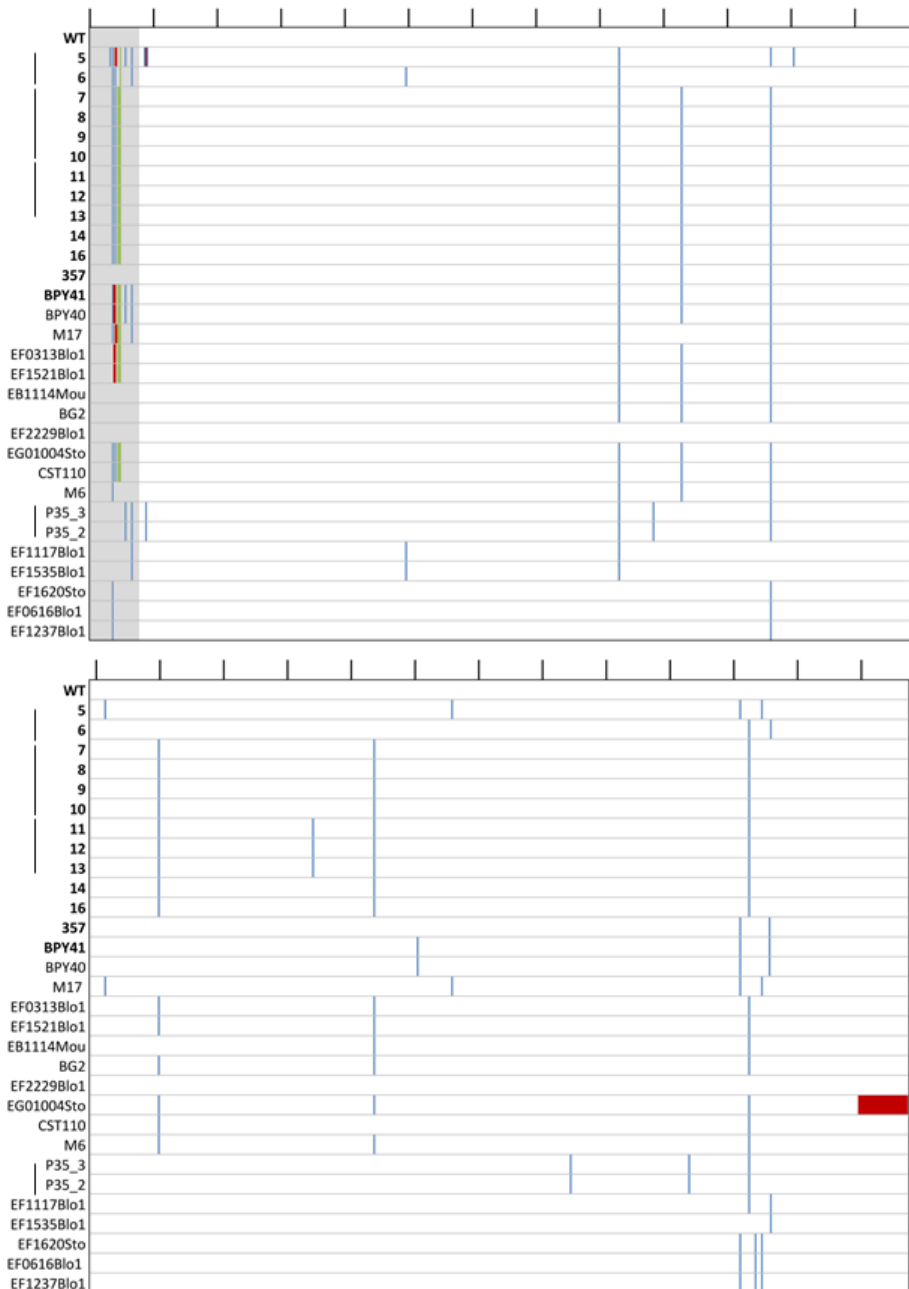

387

388 **Figure 7. Mutation on the protein sequence of *CgMIP1* of *C. glabrata* clinical strains compared to the**  
389 **wild type.** Wild type (ATCC 2001, WT), the first fourteen strains marked in bold are *petite* mutants,  
390 below there are the seventeen respiratory-competent strains. Grey: predicted mitochondrial signal  
391 peptide of the wild type, blue: Amino acid substitutions, green: Insertions, and red: Deletions. Black lines  
392 on top indicate the amino acid position every 50 amino acids. Black lines next to the strains' names

393 indicate that those strains have been isolated from the same patient.

## 394 **DISCUSSION**

395 Despite the fact that *C. glabrata* is phylogenetically more closely related to the baker's yeast *S. cerevisiae*  
396 than to the pathogenic *C. albicans*, it has by now become the most important non-*Candida albicans*  
397 *Candida* (NCAC) species to cause disease and is of growing concern in the clinics (Rodrigues, Silva, &  
398 Henriques, 2014). The relatively low host cell damage and immune responses that *C. glabrata* elicits,  
399 combined with its ability to survive and replicate within macrophages, indicates that stealth and  
400 persistence are its main virulence strategies during infection (Brunke & Hube, 2013). However, residing  
401 for a long time within the human body requires phenotypic plasticity to survive changing stresses, such  
402 as osmotic, ER, and oxidative stress, hypoxia, and starvation (Bliska & Casadevall, 2009; Casadevall, 2008;  
403 Gerwien, Skrahina, Kasper, Hube, & Brunke, 2018; Hube, 2009; Krishnan & Askew, 2014; Vylkova &  
404 Lorenz, 2014). One mechanism that leads to the better host adaptation and virulence in human  
405 pathogenic bacteria and fungi is the inactivation or loss of specific genes, which are then known as  
406 antivirulence genes (Bliven & Maurelli, 2012; Siscar-Lewin et al., 2019).

407 Specifically, in *C. albicans* and *C. glabrata* mutations decreasing mitochondrial function can affect host-  
408 pathogen interactions. Although *C. albicans* is considered a *petite*-negative species (Chen & Clark-  
409 Walker, 2000), a mutant with uncoupled oxidative phosphorylation was recovered after serial passaging  
410 of wild type *C. albicans* through murine spleens (Cheng, Clancy, Zhang, et al., 2007). It showed higher  
411 tolerance to ROS, altered cell wall composition, resistance to phagocytosis by neutrophils and  
412 macrophages, as well as an increased persistence and higher fungal burden in mice. Of note, in contrast  
413 to its progenitor, this strain did not kill infected mice any more. The authors pointed out that the  
414 uncoupled oxidative phosphorylation lowers intrinsic ROS production, which may be advantageous  
415 inside the phagosome, while the altered cell wall composition may diminish immune recognition. The  
416 mutant also showed a lower susceptibility to fluconazole and voriconazole due to increased expression  
417 of the efflux pump-encoding gene *MDR1* (Cheng, Clancy, Nguyen, Clapp, & Nguyen, 2007). In another  
418 example, a respiratory-competent *C. glabrata* strain and its *petite* mutant were sequentially isolated  
419 from a patient undergoing long-term fluconazole treatment (Ferrari, Sanguinetti, De Bernardis, et al.,  
420 2011; Posteraro et al., 2006). The mutant showed a high expression of virulence- and efflux pumps-  
421 related genes, oxido-reductive metabolism and stress response genes, as well as cell wall-related genes.

422 It also led to a higher mortality in neutropenic mice and a higher tissue burden in immunocompetent  
423 mice (Ferrari, Sanguinetti, De Bernardis, et al., 2011), and it was also resistant to azoles due to the *PDR1*-  
424 dependent upregulation of the efflux pumps-encoding genes *CDR1* and *CDR2*. The mitochondrial-related  
425 gene, *PUP1*, was also strongly upregulated in a *PDR1*-dependent manner. Interestingly, enhanced  
426 virulence of *C. glabrata* associated with high upregulation of *CDR1* and *PUP1* has been observed in azole  
427 resistance clinical isolates resulting from gain of function mutations (GOF) in the *PDR1* gene (Ferrari,  
428 Sanguinetti, Torelli, et al., 2011). It was therefore speculated that both genes may contribute to favor  
429 *C. glabrata* in host interactions, in a still unknown manner. Thus, the *petite* phenotype may constitute a  
430 relevant pathogenic form of *C. glabrata*, and genes involved in mitochondrial function may be  
431 considered potential antivirulence genes (Siscar-Lewin et al., 2019).

432 In agreement with these previous findings, our study highlights the adaptive advantage that the lack of  
433 mitochondrial function has for *C. glabrata* under infection conditions. Likely not coincidentally, the  
434 mtDNA polymerase encoding gene *CgMIP1* seems to have been under selective pressures during the  
435 evolution of *C. glabrata* (Gabaldon et al., 2013). We found that deletion of this gene leads to loss of  
436 mtDNA and triggers the *petite* phenotype in both *C. glabrata* and *S. cerevisiae*. This phenotype confers a  
437 survival advantage at early time points after phagocytosis, but only for *C. glabrata* and not for  
438 *S. cerevisiae*. In addition, *petite* variants appeared from phagocytosed wild type cells at an appreciable  
439 frequency especially at early time points during their interaction with macrophages. We argue that these  
440 were likely induced by the intraphagosomal environment and provided an immediate advantage to the  
441 fungus. However, within the phagosome, glucose is absent and only alternative carbon sources are  
442 available (carboxylic acids, amino acids, peptides, N-acetylglucosamine, and fatty acids), which require  
443 mitochondrial oxido-reductive power for their metabolism (Lorenz et al., 2004; Sprenger et al., 2018).  
444 We assume that this is the reason that in the long term, after four and seven days, the advantage of the  
445 *petite* phenotype is reverted, as they starve and are recovered in ever lower numbers. Of note, the fact  
446 that in this experimental model oxygen is present at normal atmospheric levels may confer an advantage  
447 to the respiratory competent wild type. In infected tissue *in vivo*, in contrast, oxygen levels are low and it  
448 is known that hypoxia modulates innate immune response and enhance phagocytosis (Anand et al.,  
449 2007; Nizet & Johnson, 2009). In this case, the *petite* phenotype may even confer an adaptive advantage  
450 over respiratory-competent yeasts, which must rewire their metabolism upon confrontation with  
451 phagocytes. In addition, we observed that the *petite* phenotype can reverse if the fungi find themselves  
452 outside macrophages and the associated stresses. It seems feasible therefore that macrophage-induced

453 *petites* regain their normal growth behavior *in vivo* if the fungus escapes the phagocytes and the change  
454 into a *petite* phenotype represents a temporary adaptation of *C. glabrata* to adverse conditions.

455 Importantly, our macrophage-derived *petite* variants showed high resistance to azoles, in addition to  
456 other typical *petite* characteristics. In turn, fluconazole-derived *petites* showed the expected loss of  
457 susceptibility to azoles and surprisingly, a better survival to phagocytosis as well. It is known that  
458 fluconazole can trigger (temporary) loss of mitochondrial function in *C. glabrata* and *S. cerevisiae*, and as  
459 a consequence an increased fluconazole resistance (Brun et al., 2004; Kaur et al., 2004; Sanglard et al.,  
460 2001; Zhang & Moye-Rowley, 2001). However, to our knowledge this study shows for the first time that  
461 phagocytosis and intraphagosomal residence can lead to the emergence of fluconazole resistance, and  
462 *vice versa*, in a potentially clinically important cross-resistance phenomenon.

463 The mechanistic basis of how these resistances develop is not completely understood: the clinical *petite*  
464 variants reported so far have all been isolated from patients undergoing fluconazole treatment  
465 (Bouchara et al., 2000; Posteraro et al., 2006) and most of the *petite* isolates analyzed here lack mtDNA,  
466 but synthesis inhibition or degradation of mtDNA by the action of azoles has not yet been reported. In  
467 fact, it was shown that azole exposure does not always lead to a loss of mtDNA, but rather damages  
468 mitochondrial components (Kaur et al., 2004; Sanglard et al., 2001; Zhang & Moye-Rowley, 2001).  
469 Fluconazole-induced *petite* can revert at a frequency of  $1.5 \times 10^{-2}$  (Kaur et al., 2004), which suggests a  
470 genetic or epigenetic regulation. Our data indicates that *C. glabrata* turns *petite* within the macrophages  
471 due to phagosomal oxidative stress, since we observed similar conversions during incubation with H<sub>2</sub>O<sub>2</sub>.  
472 It is known that oxidative stress can trigger mitochondrial damage and loss of activity by affecting  
473 mitochondrial membrane permeability, the respiratory chain or the mtDNA (Guo et al., 2013; Qin et al.,  
474 2011). These factors could be at work during the induction of the *petite* phenotype in macrophages.  
475 Importantly, like azole-induced *petites*, we found that a fraction of these macrophage-derived *petite*  
476 phenotypes were reversible.

477 The loss of mitochondrial function also activates compensatory pathways, such as detoxifying  
478 mechanisms and cell wall remodeling (Shingu-Vazquez & Traven, 2011). Indeed, all our *petite* strains  
479 showed constitutive expression of efflux pumps-related (and azole resistance-mediating) genes *PDR1*  
480 and *CDR1*, and some transcription of heat shock protein-encoding genes like *HSP12* and *HS42*, and *SGA1*  
481 (Ferrari, Sanguinetti, De Bernardis, et al., 2011; Moskvina, Schuller, Maurer, Mager, & Ruis, 1998).  
482 Moreover, all *C. glabrata petites* exhibited a high resistance to ER stressors. We suggest that this ER

483 stress resistance is acquired via mitochondria dysfunction and confers an adaptive advantage in the  
484 phagosome, since it has been shown that ROS may not act alone in killing the fungus but in combination  
485 with additional stresses: Suppression of ROS by macrophages alone does not increase the fungal survival  
486 (Kasper et al., 2015). In addition this ER stress resistance would also confer protection against the  
487 generic ER stress that pathogens face during infection (Cohen, Lobritz, & Collins, 2013; Kaur et al., 2007;  
488 Tiwari, Thakur, & Shankar, 2015). We also showed that the *PDR1* pathway is at least partially involved in  
489 the ER stress resistance as well as in macrophages survival, in agreement with previous findings (Ferrari,  
490 Sanguinetti, Torelli, et al., 2011). The majority of *petites* also showed increased expression of members  
491 of the *YPS* gene family. It has been suggested that Yps-mediated cell wall remodeling can play a role in  
492 altering or suppressing macrophage activation (Kaur et al., 2007), and we hypothesize that this may  
493 contribute to the better survival of *petite* variants within the phagosome. Of note, *S. cerevisiae*, which  
494 did not benefit from a *petite* phenotype in macrophages, also did not show such a constitutive *YPS*  
495 orthologue expression. In addition, it has been reported that different mitochondrial mutants of  
496 *S. cerevisiae* show increased sensitivity to oxidative stress by H<sub>2</sub>O<sub>2</sub> (Thorpe et al., 2004), which was not  
497 the case for our *Cgmip1Δ* mutant, and this phenomenon should therefore not influence its survival in  
498 macrophages. The altered cell wall, and especially the increased mannan exposure of *Cgmip1Δ*, can  
499 explain the increased phagocytosis rate, as this is known to be mannan-dependent (Keppler-Ross et al.,  
500 2010; Snarr, Qureshi, & Sheppard, 2017). Clearly, the induction of a *petite* phenotype by either azoles or  
501 phagocytosis had a strong influence on the macrophage-fungus interactions, benefitting *C. glabrata* in  
502 the phagosome.

503 The *petite* phenotype shows nonetheless a strong handicap in fitness and competitiveness in our  
504 commensal-like model, likely due to its slow growth, as observed before (Ben-Ami & Kontoyiannis,  
505 2012). However, in our model of vaginal candidiasis treated with fluconazole, the *petite* phenotype  
506 shows a steady advantage. Therefore, we suggest that the *petite* phenotype, which also appears  
507 naturally and in absence of stress at low frequencies, serves as a bet-hedging strategy to face stressful  
508 conditions, such as phagocytosis or azole exposure, in *C. glabrata*. Similar phenotypes are described in  
509 bacteria, for which it is known that microorganisms that give rise to heterogeneous populations and  
510 phenotypic switching are more likely to survive in fluctuating environments, than otherwise “stable”  
511 populations (Arnoldini et al., 2014; Holland, Reader, Dyer, & Avery, 2014). Important intracellular  
512 pathogens like *Staphylococcus aureus* and *Salmonella* are known to form small colony variants (SCVs), an  
513 analogous phenotype of *petite*, as part of the bacterial heterogeneity that might confer an adaptive

514 advantage upon environmental changes (Arnoldini et al., 2014; Day, 2013; Tuchscher et al., 2019).  
515 These show a decrease in antibiotic susceptibility, link to chronic and relapsing, often therapy-refractory  
516 infections. Moreover, they show reduced expression of virulence factors, and higher adhesion, which  
517 promotes internalization in host cells and facilitate immune-evasion and long-term persistence within  
518 their hosts (Kahl, Becker, & Löffler, 2016; Proctor et al., 2006). SCVs from many gram-positive  
519 and -negative bacteria have been recovered from clinical tissues (Kahl et al., 2016; Proctor et al., 2006).  
520 On the yeast counterpart, so far only a *petite* mutant of *C. glabrata* has been reported to possess any  
521 pathogenic advantage (Ferrari, Sanguinetti, De Bernardis, et al., 2011). Analogously to the SCVs, these  
522 mutants have been isolated from cases of antifungal treatment (Bouchara et al., 2000) and recurrent  
523 fungemia (Posteraro et al., 2006), with a decreased susceptibility to antifungals and increased fungal  
524 burden in animal models of infection (Ferrari, Sanguinetti, De Bernardis, et al., 2011). Furthermore,  
525 recently it has been shown that a negative correlation between fitness costs derived from drug  
526 resistance and virulence is not always the case, but in fact virulence could be maintained or even  
527 increased in the presence of such costs that results in a reduced growth rate in *C. glabrata* (Duxbury,  
528 Bates, Beardmore, & Gudelj, 2020). This agrees with our hypothesis of *petite* phenotype as an  
529 advantageous strategy during infection despite its slower growth.

530 Given the advantages of *petite* variants during infection, one would expect to frequently find *C. glabrata*  
531 *petite* phenotypes in clinical samples; but although *petites* have been reported (Bouchara et al., 2000;  
532 Posteraro et al., 2006), these reports seem to be rare. Nonetheless, when we specifically looked for  
533 *petite* phenotype in clinical isolates we found seventeen of these strains. They shared all the hallmark  
534 features with *Cgmip1Δ*, macrophage-, and fluconazole-derived *petites*. The majority showed loss of  
535 mtDNA, azole resistance, and increased survival upon phagocytosis. It may well be that *C. glabrata petite*  
536 phenotypes are actually more common in clinical samples, but potentially overlooked because of their  
537 slow growth.

538 We started these investigations because of the signs of recent selection on the mitochondrial DNA  
539 polymerase gene *CgMIP1*. We hypothesized that this could indicate a role in the adaptation of  
540 *C. glabrata* to host environments. Indeed, some (but not all) of the *petite* clinical isolates we investigated  
541 showed mutations in the *CgMIP1* gene sequence and the majority showed a insertion pattern in the  
542 presumable mitochondria targeting sequence, which may relate to their *petite* phenotypes via a  
543 reduction of mitochondrial polymerase function. In addition, we found that other mitochondria-related

544 proteins did not show similar mutation frequency, which supports the idea that CgMip1 may still be a  
545 target for selection. It has been shown that point mutations in the polymerase domain of the  
546 orthologous *MIP1* gene in *S. cerevisiae* triggered emergence of *petites*, and this frequency increased with  
547 higher temperatures. Specifically, the mutation E900G yielded from 6% *petites* at 28°C to 92% at 36°C  
548 (Baruffini, Ferrero, & Foury, 2007). While many of these *petites* were  $\rho^0$  – completely devoid of  
549 mtDNA – some still contained amplified mtDNA fragments that map to various positions of the mtDNA  
550 and were considered  $\rho^-$  (Baruffini et al., 2007). These mtDNA fragments can rescue strains that are  
551 respiratory deficient due to mutations in mtDNA by recombination after crossing (Baruffini et al., 2006;  
552 Tzagoloff, Akai, Needleman, & Zulch, 1975). Interestingly, we also found mtDNA fragments in our  
553 sequence data of clinical petite strains (data not shown), similar to *S. cerevisiae*  $\rho^-$ . Moreover, we also  
554 found that wild type strain of *C. glabrata* and its two most closely related human pathogens,  
555 *Nakaseomyces nivariensis* and *Nakaseomyces bracarensis*, show the substitution E926D in Mip1 when  
556 compared to the environmental species *Nakaseomyces delphensis*, *Nakaseomyces bacillisporus*, and  
557 *Candida castelli*. Since this is equivalent to E900 position in *S. cerevisiae*, which upon mutation increases  
558 the frequency of *petite* occurrences, we hypothesize that on the one hand *C. glabrata* could more easily  
559 turn *petite* than environmental *Nakaseomyces* species, but on the other hand it can also retain mtDNA in  
560 its genome as a possible mechanism to recover mitochondrial function once the *petite* phenotype is not  
561 adaptive. These tantalizing hypotheses will be tested in the near future.

562 Alternatively, the *C. glabrata* *CgMIP1* gene sequence may be the target of epigenetic regulation, as  
563 epigenetics have been suggested to be involved in the reversion of *petite* phenotype to wild type (Kaur  
564 et al., 2004). In these models, mtDNA levels are reduced down to a (near) complete loss of mitochondrial  
565 function. Upon resumption of polymerase function, the mitochondria function and growth then reverts  
566 to normal. The ability to switch between *petite* and non-*petite* phenotype would confer *C. glabrata* an  
567 important phenotypic plasticity to adapt to the host's changing environments: The *petite* phenotype is  
568 less competitive as a commensal, but much fitter in infection situations with active phagocytes and  
569 antifungal treatment.

570 In conclusion, this study shows how temporary mitochondria dysfunction triggers a *petite* phenotype in  
571 *C. glabrata* under infection-like conditions, with the potential to confer cross-resistance between the  
572 macrophages and azole antifungal treatment. This has three implications. First, it adds mitochondrial  
573 function to the list of potential antivirulence factors, since its loss results in a gain in virulence potential.



574 Second, it has implications for the treatment of *C. glabrata*, as fluconazole may inadvertently increase  
575 the fitness of the fungus against the innate host defenses. Due to the *petite* morphology and long  
576 generation times, such resistant isolates may then be missed in standard diagnostics. Third, our  
577 observations provide a potential clinical relevant route for the emergence of azole resistance of  
578 *C. glabrata* by immune activities, a new paradigm in the development of antifungal resistance.

## 579 **MATERIALS AND METHODS**

### 580 **Screening and acquisition of suspected petite *C. glabrata* strains**

581 In the course of routine diagnostics – executed by the Institute of Hygiene and Microbiology in Würzburg  
582 – all accumulated chromogenic candida agar plates (CHROMagar, Becton Dickinson, New Jersey, USA)  
583 were systematically collected and incubated for at least 7 days at 37°C prior to screening. After  
584 incubation plates were visually screened concerning growth, color and morphology. Only suspected  
585 *C. glabrata* small colony variants were subisolated and reincubated for a minimum of 3 days at 37°C. In  
586 case of a confirmed growth behavior final species identification was executed by MALDI-TOF  
587 (BioMerieux, Paris, France).

588 466 from a total of 3756 agar plates – originating from various clinical specimen examined between  
589 November 2019 and June 2020– exhibited growth after incubation. 525 different strains were identified  
590 through chromogenic media, of which the majority (312) presented itself in a green color suggesting  
591 *C. albicans*, whereas in 170 cases mauve colonies were observed. 82 of these were identified as  
592 *C. glabrata* using MALDI-TOF. Based on morphology, 41 strains were suspected to be *petites*, which was  
593 finally confirmed in 20 cases.

### 594 **Strains and growth conditions**

595 All strains used in this study are listed in Table S2. *C. glabrata* mutant strains are derivatives of the  
596 laboratory strain ATCC 2001. In each strain a single open reading frame (ORF) was replaced with a bar-  
597 coded NAT1 resistance cassette in the strain ATCC 2001. All yeast strains were routinely grown overnight  
598 in YPD (1% yeast extract, 1% peptone, 2% glucose) at 37°C in a 180 rpm shaking incubator.

599 To analyze sensitivity to H<sub>2</sub>O<sub>2</sub> and ER stress, 5 µl of serial diluted yeast cultures (10<sup>7</sup>, 10<sup>6</sup>, 10<sup>5</sup>, 10<sup>4</sup>, 10<sup>3</sup>, 10<sup>2</sup>  
600 cells/mL) were dropped on solid YPD media (YPD, agarose 2%) containing increasing concentrations of



601 H<sub>2</sub>O<sub>2</sub> (7.5 mM, 10 mM and 12 mM), Tunicamycin (2 µg/ml), DTT (10 mM) or 2-Mercaptoethanol (12  
602 mM). Pictures were taken after 24 and 48 hours of incubation at 37°C.

603 Mitochondria activity was visualized by growing serial dilutions of the strains on YPD agar containing  
604 0.02% TTC (2,3,5-Triphenyltetrazolium chloride)(Sigma-Aldrich), and incubating cells in minimum media  
605 (1% yeast nitrogen base, 1% amino acids, 0.5% ammonium sulfate) with 4% glycerol as sole carbon  
606 source for 4 days at 37°C in a 180 rpm shaking incubator.

## 607 Table S2

| Name                                                                                                                                                                | Genetic background | Source                                                                               |
|---------------------------------------------------------------------------------------------------------------------------------------------------------------------|--------------------|--------------------------------------------------------------------------------------|
| <i>C. glabrata</i> reference strain                                                                                                                                 | ATCC2001           | Dujon <i>et al.</i> , 2004                                                           |
| <i>Cgmip1Δ</i>                                                                                                                                                      | ATCC2001           | This study                                                                           |
| <i>Cgmip1Δ+pdr1Δ</i>                                                                                                                                                | ATCC2001           | This study                                                                           |
| <i>pdr1Δ</i>                                                                                                                                                        | ATCC2001           | This study                                                                           |
| Macrophages-derived <i>petites</i> : MO-1-3                                                                                                                         | ATCC2001           | This study                                                                           |
| Fluconazole-derived <i>petites</i> : FL-1-3                                                                                                                         | ATCC2001           | This study                                                                           |
| 4-14, 16, 21, 35, 36                                                                                                                                                | Clinical isolates  | Institute for Hygiene and Microbiology.<br>Julius- Maximilians- University, Würzburg |
| M17 , EF0313Blo1, EF1521Blo1, EB1114Mou,<br>BG2, EF2229Blo1, EG01004Sto, CST110, M6,<br>P35_3, P35_2, EF1117Blo1, EF1535Blo1,<br>EF1620Sto, EF0616Blo1 , EF1237Blo1 | Clinical isolates  | Carreté <i>et al.</i> , 2018                                                         |
| 357                                                                                                                                                                 | Clinical isolates  | National Reference Center for Invasive Fungal Infections (NRZMyk)                    |
| BPY40/41                                                                                                                                                            | Clinical isolates  | Ferrari <i>et al.</i> , 2011                                                         |
| <i>S. cerevisiae</i> reference strain                                                                                                                               | BY4741             | European Saccharomyces Cerevisiae Archive For Functional Analysis                    |
| <i>Scmip1Δ</i>                                                                                                                                                      | BY4741             | (EUROSCARF)                                                                          |

## 608 Table S2. Strains used in this study

### 609 Growth assays

610 To analyze stress sensitivity, five microliters of a yeast cell suspension ( $2 \times 10^7$  cells/mL) was added to  
611 195 µL media in a 96-well plate (Tissue Culture Test Plate, TPP Techno Plastic Products AG) containing  
612 liquid YPD or YPD and different concentrations of fluconazole (10, 25, 35, 50, 75, 100 µg/ml) and  
613 tunicamycin (0.5, 1, 1.5, 2 and 3 µg/ml). For the ER stress analysis yeast were incubated in YPD and  
614 tunicamycin (1.5 µg/ml). The growth was monitored by measuring the absorbance at 600 nm every  
615 30 min for 150 cycles at 37 °C, using a Tecan Reader (Plate Reader infinite M200 PRO, Tecan Group

616 GmbH) with orbital shaking. All experiments were done in independent biological triplicates on different  
617 days, and shown as mean with standard deviation (SD) for each time point.

618 The Minimum Inhibitory Concentration (MIC<sub>50</sub>) was done in a 96-well plate (Tissue Culture Test Plate,  
619 TPP Techno Plastic Products AG) containing minimum media (1% yeast nitrogen base, 1% amino acids,  
620 0.5% amonio sulfate and 2% glucose) with increasing concentrations of fluconazole (FL) (4, 8, 16, 32, 64,  
621 128, 256 µg/ml), voriconazole (VC) (0.5, 1, 2, 4, 8, 16 µg/ml) and clotrimazole (CL) (1, 2, 4, 8, 16 µg/ml) at  
622 37°C.

### 623 **Fungal RNA isolation**

624 For preparation of RNA from *in vitro* cultured *Candida* cells, stationary phase yeast cells were washed in  
625 PBS and OD was adjusted to 0.4 in 5 mL liquid YPD. After 3 h, cells were harvested and centrifuged. The  
626 isolation of the fungal RNA was performed as previously described (Lüttich, Brunke, & Hube, 2012). The  
627 RNA was then precipitated by adding 1 volume of isopropyl alcohol and one tenth volume of sodium  
628 acetate (pH 5.5). The quantity of the RNA was determined using the NanoDrop Spectrophotometer ND-  
629 1000 (NRW International GmbH).

### 630 **Expression analysis by reverse transcription-quantitative PCR (qRT-PCR)**

631 cDNA was synthesized from DNase-treated RNA (1000 ng) using 0.5 µg oligo-dT<sub>12-18</sub>,  
632 100 U Superscript™ III Reverse Transcriptase and 20 U RNaseOUT™ Recombinant RNase Inhibitor (all:  
633 Thermo Fischer Scientific) in a total volume of 20 µL for 2 h at 42 °C followed by heat-inactivation for  
634 15 min at 70 °C. Quantitative PCR with EvaGreen® QPCR Mix II (Bio&SELL) was performed with 1:10  
635 diluted cDNA. Primers (Table S3) were used at a final concentration of 500 nM. Target gene expression  
636 was calculated using the  $\Delta\Delta C_t$  method (Pfaffl, 2001), with normalization to the housekeeping genes  
637 *CgACT1* for *C. glabrata* or *ScACT1* for *S. cerevisiae*. For mtDNA quantification, yeast DNA was extracted  
638 following Harju *et al.*, protocol (Harju, Fedosyuk, & Peterson, 2004) and 100 ng was the reaction  
639 concentration. *ScCOX3* and *CgCOX3* were used as a mitochondrial target gene and *CgACT1* or *ScACT1* as  
640 housekeeping genes. All experiments were done in independent biological triplicates on different days,  
641 and shown as mean with standard deviation (SD) for each time point.

642 **Chitin, mannan and  $\beta$ -glucan exposure**

643 To measure chitin content, yeasts from an overnight culture were washed in PBS and incubated with  
644 9 ng/ml of WGA-FITC diluted in PBS for 1 h at room temperature. After washing with PBS, fluorescence  
645 was quantified by flow cytometry (BD FACS Verse<sup>®</sup> BD Biosciences, Franklin Lakes, USA) counting  
646 10,000 events. For mannan quantification, yeast cells were washed with PBS and incubated with  
647 concanavalin A-647 for 30 min at @37°C. After washing with PBS, fluorescence was quantified also by  
648 flow cytometry. For  $\beta$ -glucan staining, yeast cells were washed with PBS and incubated with 2% bovine  
649 serum albumin (BSA) for 30 min at 37°C, followed by a first step of 1 h of incubation with a monoclonal  
650 anti- $\beta$ -glucan antibody (Biosupplies) (diluted 1:400 in 2% BSA) and a second step of 1 h of incubation  
651 with an Alexa Fluor 488 conjugate secondary antibody (Molecular Probes) (diluted 1:1000 in 2% BSA).  
652 Fluorescence was again quantified by flow cytometry. All experiments were done in independent  
653 biological triplicates on different days, and shown as mean with standard deviation (SD) for each time  
654 point.

655 **Isolation and differentiation of human monocyte-derived macrophages (hMDMs)**

656 Blood was obtained from healthy human volunteers with written informed consent according to the  
657 declaration of Helsinki. The blood donation protocol and use of blood for this study were approved by  
658 the Jena institutional ethics committee (Ethik-Kommission des Universitätsklinikums Jena, Permission No  
659 2207–01/08). Human peripheral blood mononuclear cells (PBMCs) from buffy coats donated by healthy  
660 volunteers were separated through Lymphocytes Separation Media (Capricorn Scientific) in Leucosep™  
661 tubes (Greiner Bio-One) by density centrifugation. Magnetically labeled CD14 positive monocytes were  
662 selected by automated cell sorting (autoMACs; MiltenyiBiotec). To differentiate PBMC into human  
663 monocyte-derived macrophages (hMDMs),  $1.7 \times 10^7$  cells were seeded into 175 cm<sup>2</sup> cell culture flasks in  
664 RPMI1640 media with L-glutamine (Thermo Fisher Scientific) containing 10 % heat-inactivated fetal  
665 bovine serum (FBS; Bio&SELL) and 50 ng/mL recombinant human macrophage colony-stimulating factor  
666 M-CSF (ImmunoTools). Cells were incubated for five days at 37 °C and 5 % CO<sub>2</sub> until the medium was  
667 exchanged. After another two days, adherent hMDMs were detached with 50 mM EDTA in PBS and  
668 seeded in 96-well plates ( $4 \times 10^4$  hMDMs/well) for survival-assay, in 12-well-plates ( $4 \times 10^5$  hMDMs/well)  
669 for intracellular replication assay with 100 U/ml  $\gamma$ -INF, and 24-well-plates for long-term experiment ( $1.5$   
670  $\times 10^5$  hMDMs/well) without  $\gamma$ -INF. Prior to macrophage infection, medium was exchanged to serum free-

671 RPMI medium and 100 U/ml  $\gamma$ -INF. For long-term experiment, medium was exchanged to RPMI1640  
672 containing 10 % human serum (Bio&Sell 1: B&S Humanserum sterilised AB Male, Lot: BS.15472.5).

### 673 **Phagocytosis survival assay**

674 Mutant strains were washed in phosphate buffered saline (PBS), and total numbers of cells were  
675 assessed by the use of a hemocytometer. MDMs in 96-well-plates were infected at an MOI of 1, and  
676 after 3 h and 6 h of coincubation at 37°C and 5% CO<sub>2</sub>, non-cell-associated yeasts were removed by  
677 washing with RPMI 1640. To measure yeast survival in MDMs, lysates of infected MDMs were plated on  
678 YPD plates to determine CFU.

679 The long-term experiment was perform in 24-well-plates were the cells were infected with a MOI of 1  
680 and incubated for one week at 37°C and 5% CO<sub>2</sub>. After 3 h of coincubation, cells were washed with PBS  
681 and medium was exchanged to RPMI 1640 containing 10 % human serum. For 3 h time point both  
682 supernatant and lysate were plated. Until 1 day and 7 days times points, third of the medium was  
683 exchanged every day with in RPMI 1640 with 10% human serum. Then, only the lysate was plated. The  
684 lysate of 4 different wells was diluted accordingly and 200 CFU were plated on 4 YPD agar plates, which  
685 were afterwards incubated for 48 h at 37°C. The frequency of *petites* was determined via small colonies  
686 that were unable to grow with 4% glycerol as a sole carbon source in minimal medium (1% yeast  
687 nitrogen base, 1% amino acids, 0.5% ammonium sulfate). The growth was assayed for 3 days at 37°C in a  
688 180 rpm shaking incubator. The frequency of spontaneous *petites* was calculated by incubation of  
689  $1.5 \times 10^5$  cells ml<sup>-1</sup> in RPMI 1640 for 7 days. At 3 hours, 1 day, 4 days, and 7 days samples were collected,  
690 diluted and 200 CFU were plated on 6 YPD agar plates, which were incubated for 48 h at 37°C.

### 691 **Replication within hMDMs**

692 To quantify yeast intracellular replication, *C. glabrata* cells were labeled with 0.2 mg/mL fluorescein  
693 isothiocyanate (FITC) (Sigma-Aldrich) in carbonate buffer (0.15 M NaCl, 0.1 M Na<sub>2</sub>CO<sub>3</sub>, pH 9.0) for 30 min  
694 at 37°C. Then, yeast cells were washed in PBS and macrophages were infected at MOI 5 for 6 hours.  
695 Afterwards macrophages were washed with PBS, lysed with 0.5 % Triton™-X-100 for 15 min. Released  
696 yeast cells were washed with PBS, with 2 % BSA in PBS, and counterstained with 50 µg/mL Alexa Fluor  
697 647-conjugated concanavalin A (ConA) (Molecular Probes) in PBS at 37 °C for 30 min. The ConA-AF647-  
698 stained yeast cells were washed with PBS and fixed with Histofix (Roth) for 15 min at 37°C. As FITC is not  
699 transferred to daughter cells, differentiation of mother and daughter cells was possible: The ratio of FITC

700 positive and negative yeast cells was evaluated by flow cytometry (BD FACS Verse<sup>®</sup> BD Biosciences,  
701 Franklin Lakes (USA)) counting 10,000 events. Data analysis was performed using the FlowJO™ 10.2  
702 software (FlowJO LLC, Ashland (USA)). The gating strategy was based on the detection of single and ConA  
703 positive cells and exclusion of cellular debris.

704 For quantification of intracellular replication by fluorescence microscopy cells were fixed with Histofix  
705 (Roth) after incubation with macrophages and stained 30 min at 37°C with 25 µg/ml ConA-AF647  
706 (Molecular Probes) to visualize non-phagocytosed yeast cells. Then they were mounted cell side down in  
707 ProLong Gold antifade reagent (Molecular Probes). As FITC is not transferred to daughter cells,  
708 differentiation of mother and daughter cells was possible and intracellular replication was observed by  
709 fluorescence microscopy (Leica DM5500B and Leica DFC360).

### 710 **Competition assay**

711 This experiment was adapted from Graf et al., 2019 (Graf et al., 2019). A431 vaginal epithelial cells  
712 (Deutsche Sammlung von Mikroorganismen und Zellkulturen DSMZ no. ACC 91) were routinely cultivated  
713 in RPMI1640 media with L-glutamine (Thermo Fisher Scientific) containing 10 % heat-inactivated fetal  
714 bovine serum (FBS; Bio&SELL), at 37°C and 5% CO<sub>2</sub> for no longer than 15 passages. For detachment, cells  
715 were treated with Accutase (Gibco, Thermo Fisher Scientific). For use in experiments, the cell numbers  
716 were determined using a Neubauer chamber system and seeded in a 6-well-plate ( $4 \times 10^5$  cells/well) for 3  
717 days. For infection experiments, the medium was exchanged by fresh RPMI1640 without FBS. *L.*  
718 *rhamnosus* (ATCC 7469) was grown in MRS broth for 72 h at 37°C. Before infection, bacteria were  
719 harvested, washed with PBS and adjusted to an optical density OD<sub>600</sub> of 0.2 ( $\sim 1 \times 10^8$  CFU/ml) in  
720 RPMI1640. Then, one third of the total volume of the well of a 6-well-plate was inoculated for 18 h prior  
721 infection with *C. glabrata*. These wells were colonized with *C. glabrata* wild type and mutant separated  
722 or mixed in equal cell number to a final MOI of 1 for 24 h. The same settings were established in the  
723 absence of bacteria as controls. Additionally, in some wells infected with both strains in the presence or  
724 absence of bacteria, a final concentration of 8 ng/ml of fluconazole was added. Fluconazole was  
725 dissolved in DMSO and it was ensured that the final percentage of the organic solvent in the wells was  
726 bellowed 0.1%.

727 After 24 h, supernatants and attached cells were collected and vortexed thoroughly. Vaginal cells were  
728 treated with 0.5 % Triton™-X-100 for 5 min to lyse them and release adherent fungal cells. Samples were  
729 diluted appropriately with PBS. The diluted samples were plated on YPD plates with 1× PenStrep (Gibco,

730 Thermo Fisher Scientific) and incubated at 37°C for 1-2 days until adequate growth for determining the  
731 CFUs was reached.

### 732 **Sequencing**

733 For the DNA extraction, the strains were grown in YPD cultures for 16 h at 37°C and 180 rpm, and the  
734 following protocol was implemented to isolate DNA of high quality. The cultures were centrifuged for 5  
735 min at 4000 rpm. The pellet was suspended in sorbitol 1 M and centrifuged for 2 min at 13000 rpm. Then  
736 the pellet was resuspended in SCEM buffer (1M Sorbitol; 100mM Na-Citrate pH 5,8; 50mM EDTA pH 8;  
737 2%  $\beta$ -Mercaptoethanol and 500 units/ml Lyticase (MERCK)) and incubated at 37°C for 2 h. Afterwards the  
738 samples were centrifuged at 5 min at 13000 rpm and the pellet was resuspended in proteinase buffer  
739 (10mM Tris-CL pH 7,5; 50mM EDTA pH 7,5; 0,5% SDS and 1mg/ml Proteinase K), incubated at 60°C for 30  
740 min. Phenol:Chloroform:Isoamylalkol 25:24:1 was added after the incubation and the samples were  
741 vortexed for 4 min. Then they were centrifuged for 4 min at 13000rpm. Then the aqueous phase was  
742 transfer to a new tube and 1:1 volume of cold isopropanol was added. Samples were centrifuged for 15  
743 min at 13000 rpm. The pellets were washed with 70% ethanol once and centrifuged again for 3 min at  
744 13000 rpm. After drying, the pellet was resuspended in water and RNase. The genomic DNA was stored  
745 in -20°C until sequencing. The sequencing of the clinical strains was done by the company GENEWIZ,  
746 using Illumina NovaSeq 2x150 bp sequencing and 10M raw paired-end reads per sample package.  
747 Additionally, paired-end reads for non-petite clinical isolates were obtained from a previous study (NCBI  
748 SRA project SRP099102 (Carrete et al., 2018)). All reads were aligned to the *C. glabrata* reference  
749 genome (version s03-mo1-r06, (Dujon et al., 2004)) using bowtie2 version 2.4.1. Variants were called  
750 from the resulting alignments using the callvariants script in bbmap (version 38.44) (SOURCEFORGE,  
751 2014) with standard parameters. The resulting variant files were applied to the reference genome by the  
752 bcftools consensus function (version 1.10.2) (GitHub, 2019).

### 753 **In silico analysis and statistics**

754 All the results were obtained from at least three biological replicates (indicated in figure legends). Mean  
755 and standard deviation of these replicates are shown. Experiments performed with MDMs were isolated  
756 from at least three different donors (see figure legends). Data were analyzed using GraphPad Prism 5  
757 (GraphPad Software, San Diego, USA). The data were generally analyzed using a two-tailed, unpaired  
758 Student's t test for intergroup comparisons, if not indicated otherwise.

759 **DATA AVAILABILITY**

760 Raw sequencing data that support the findings of this study are available in the Sequence Read Archive  
761 (SRA) of the NCBI under the accession number PRJNA665484 ([www.ncbi.nlm.nih.gov/sra/PRJNA665484](http://www.ncbi.nlm.nih.gov/sra/PRJNA665484)).

762 **ACKNOWLEDGEMENTS**

763 We thank Daniel Fischer, Marcel Sprenger, Franziska Pieper, Sophie Austermeier, and Stephanie Wisgott  
764 for their help and support during isolation of mBMDMs, and during isolation and cultivation of hMDMs.  
765 Further, we thank Franziska Pieper for her technical assistance in MIC<sub>50</sub> analysis; Marina Pekmezovic and  
766 Marisa Valentine for their help with epithelial cell culture; Volha Skrahina for her technical assistance in  
767 creating the double mutant; Marina Pekmezovic for her help with microscopy imaging. We also thank  
768 Dominique Sanglard for providing clinical strains BPY40/41 and Grit Walther for providing clinical strains  
769 from the National Reference Center for Invasive Fungal Infections (NRZMyk). The auto-MACS system for  
770 magnetic isolation of human monocytes was provided by the research group Fungal Septomics.

771 **COMPETING INTERESTS**

772 The authors declare no competing interests.

773 Anand, R. J., Gribar, S. C., Li, J., Kohler, J. W., Branca, M. F., Dubowski, T., . . . Hackam, D. J. (2007).  
774 Hypoxia causes an increase in phagocytosis by macrophages in a HIF-1alpha-dependent manner.  
775 *J Leukoc Biol*, 82(5), 1257-1265. doi:10.1189/jlb.0307195  
776 Arnoldini, M., Vizcarra, I. A., Pena-Miller, R., Stocker, N., Diard, M., Vogel, V., . . . Ackermann, M. (2014).  
777 Bistable expression of virulence genes in salmonella leads to the formation of an antibiotic-  
778 tolerant subpopulation. *PLoS Biol*, 12(8), e1001928. doi:10.1371/journal.pbio.1001928  
779 Baruffini, E., Ferrero, I., & Foury, F. (2007). Mitochondrial DNA defects in *Saccharomyces cerevisiae*  
780 caused by functional interactions between DNA polymerase gamma mutations associated with  
781 disease in human. *Biochim Biophys Acta*, 1772(11-12), 1225-1235.  
782 doi:10.1016/j.bbadis.2007.10.002  
783 Baruffini, E., Lodi, T., Dallabona, C., Puglisi, A., Zeviani, M., & Ferrero, I. (2006). Genetic and chemical  
784 rescue of the *Saccharomyces cerevisiae* phenotype induced by mitochondrial DNA polymerase  
785 mutations associated with progressive external ophthalmoplegia in humans. *Hum Mol Genet*,  
786 15(19), 2846-2855. doi:10.1093/hmg/ddl219  
787 Batova, M., Borecka-Melkusova, S., Simockova, M., Dzugasova, V., Goffa, E., & Subik, J. (2008). Functional  
788 characterization of the CgPGS1 gene reveals a link between mitochondrial phospholipid  
789 homeostasis and drug resistance in *Candida glabrata*. *Curr Genet*, 53(5), 313-322.  
790 doi:10.1007/s00294-008-0187-9  
791 Ben-Ami, R., & Kontoyiannis, D. P. (2012). Resistance to echinocandins comes at a cost: the impact of  
792 FKS1 hotspot mutations on *Candida albicans* fitness and virulence. *Virulence*, 3(1), 95-97.  
793 doi:10.4161/viru.3.1.18886



- 794 Bliska, J. B., & Casadevall, A. (2009). Intracellular pathogenic bacteria and fungi--a case of convergent  
795 evolution? *Nat Rev Microbiol*, 7(2), 165-171. doi:10.1038/nrmicro2049
- 796 Bliven, K. A., & Maurelli, A. T. (2012). Antivirulence genes: insights into pathogen evolution through gene  
797 loss. *Infect Immun*, 80(12), 4061-4070. doi:10.1128/IAI.00740-12
- 798 Bongomin, F., Gago, S., Oladele, R. O., & Denning, D. W. (2017). Global and Multi-National Prevalence of  
799 Fungal Diseases-Estimate Precision. *J Fungi (Basel)*, 3(4). doi:10.3390/jof3040057
- 800 Bouchara, J. P., Zouhair, R., Le Boudouil, S., Renier, G., Filmon, R., Chabasse, D., . . . Defontaine, A. (2000).  
801 In-vivo selection of an azole-resistant petite mutant of *Candida glabrata*. *J Med Microbiol*, 49(11),  
802 977-984. doi:10.1099/0022-1317-49-11-977
- 803 Brun, S., Berges, T., Poupard, P., Vauzelle-Moreau, C., Renier, G., Chabasse, D., & Bouchara, J. P. (2004).  
804 Mechanisms of azole resistance in petite mutants of *Candida glabrata*. *Antimicrob Agents  
805 Chemother*, 48(5), 1788-1796. doi:10.1128/aac.48.5.1788-1796.2004
- 806 Brun, S., Dalle, F., Saulnier, P., Renier, G., Bonnin, A., Chabasse, D., & Bouchara, J. P. (2005). Biological  
807 consequences of petite mutations in *Candida glabrata*. *J Antimicrob Chemother*, 56(2), 307-314.  
808 doi:10.1093/jac/dki200
- 809 Brunke, S., & Hube, B. (2013). Two unlike cousins: *Candida albicans* and *C. glabrata* infection strategies.  
810 *Cell Microbiol*, 15(5), 701-708. doi:10.1111/cmi.12091
- 811 Carrete, L., Ksiezopolska, E., Pegueroles, C., Gomez-Molero, E., Saus, E., Iraola-Guzman, S., . . . Gabaldon,  
812 T. (2018). Patterns of Genomic Variation in the Opportunistic Pathogen *Candida glabrata* Suggest  
813 the Existence of Mating and a Secondary Association with Humans. *Curr Biol*, 28(1), 15-27 e17.  
814 doi:10.1016/j.cub.2017.11.027
- 815 Casadevall, A. (2008). Evolution of intracellular pathogens. *Annu Rev Microbiol*, 62, 19-33.  
816 doi:10.1146/annurev.micro.61.080706.093305
- 817 Caudle, K. E., Barker, K. S., Wiederhold, N. P., Xu, L., Homayouni, R., & Rogers, P. D. (2011). Genomewide  
818 expression profile analysis of the *Candida glabrata* Pdr1 regulon. *Eukaryot Cell*, 10(3), 373-383.  
819 doi:10.1128/EC.00073-10
- 820 Chen, X. J., & Clark-Walker, G. D. (2000). The petite mutation in yeasts: 50 years on. *Int Rev Cytol*, 194,  
821 197-238.
- 822 Cheng, S., Clancy, C. J., Nguyen, K. T., Clapp, W., & Nguyen, M. H. (2007). A *Candida albicans* petite  
823 mutant strain with uncoupled oxidative phosphorylation overexpresses MDR1 and has  
824 diminished susceptibility to fluconazole and voriconazole. *Antimicrob Agents Chemother*, 51(5),  
825 1855-1858. doi:10.1128/AAC.00182-07
- 826 Cheng, S., Clancy, C. J., Zhang, Z., Hao, B., Wang, W., Iczkowski, K. A., . . . Nguyen, M. H. (2007).  
827 Uncoupling of oxidative phosphorylation enables *Candida albicans* to resist killing by phagocytes  
828 and persist in tissue. *Cell Microbiol*, 9(2), 492-501. doi:10.1111/j.1462-5822.2006.00805.x
- 829 Cohen, N. R., Lobritz, M. A., & Collins, J. J. (2013). Microbial persistence and the road to drug resistance.  
830 *Cell Host Microbe*, 13(6), 632-642. doi:10.1016/j.chom.2013.05.009
- 831 Cuellar-Cruz, M., Briones-Martin-del-Campo, M., Canas-Villamar, I., Montalvo-Arredondo, J., Riego-Ruiz,  
832 L., Castano, I., & De Las Penas, A. (2008). High resistance to oxidative stress in the fungal  
833 pathogen *Candida glabrata* is mediated by a single catalase, Cta1p, and is controlled by the  
834 transcription factors Yap1p, Skn7p, Msn2p, and Msn4p. *Eukaryot Cell*, 7(5), 814-825.  
835 doi:10.1128/EC.00011-08
- 836 Cuellar-Cruz, M., Lopez-Romero, E., Ruiz-Baca, E., & Zazueta-Sandoval, R. (2014). Differential response of  
837 *Candida albicans* and *Candida glabrata* to oxidative and nitrosative stresses. *Curr Microbiol*,  
838 69(5), 733-739. doi:10.1007/s00284-014-0651-3
- 839 Day, M. (2013). Yeast petites and small colony variants: for everything there is a season. *Adv Appl  
840 Microbiol*, 85, 1-41. doi:10.1016/B978-0-12-407672-3.00001-0



- 841 Diffley, J. F., & Stillman, B. (1991). A close relative of the nuclear, chromosomal high-mobility group  
842 protein HMG1 in yeast mitochondria. *Proc Natl Acad Sci U S A*, 88(17), 7864-7868.  
843 doi:10.1073/pnas.88.17.7864
- 844 Dujon, B., Sherman, D., Fischer, G., Durrens, P., Casaregola, S., Lafontaine, I., . . . Souciet, J. L. (2004).  
845 Genome evolution in yeasts. *Nature*, 430(6995), 35-44. doi:10.1038/nature02579
- 846 Duxbury, S. J. N., Bates, S., Beardmore, R. E., & Gudelj, I. (2020). Evolution of drug-resistant and virulent  
847 small colonies in phenotypically diverse populations of the human fungal pathogen *Candida*  
848 *glabrata*. *Proc Biol Sci*, 287(1931), 20200761. doi:10.1098/rspb.2020.0761
- 849 The European Committee on Antimicrobial Susceptibility Testing. Breakpoint tables for interpretation of  
850 MICs for antifungal agents. (2020).  
851 <http://www.eucast.org/astoffungi/clinicalbreakpointsforantifungals/>
- 852 Ferrari, S., Sanguinetti, M., De Bernardis, F., Torelli, R., Posteraro, B., Vandeputte, P., & Sanglard, D.  
853 (2011). Loss of mitochondrial functions associated with azole resistance in *Candida glabrata*  
854 results in enhanced virulence in mice. *Antimicrob Agents Chemother*, 55(5), 1852-1860.  
855 doi:10.1128/AAC.01271-10
- 856 Ferrari, S., Sanguinetti, M., Torelli, R., Posteraro, B., & Sanglard, D. (2011). Contribution of CgPDR1-  
857 regulated genes in enhanced virulence of azole-resistant *Candida glabrata*. *PLoS One*, 6(3),  
858 e17589. doi:10.1371/journal.pone.0017589
- 859 Gabaldon, T., Martin, T., Marcet-Houben, M., Durrens, P., Bolotin-Fukuhara, M., Lespinet, O., . . .  
860 Fairhead, C. (2013). Comparative genomics of emerging pathogens in the *Candida glabrata* clade.  
861 *BMC Genomics*, 14, 623. doi:10.1186/1471-2164-14-623
- 862 Gerwien, F., Skrahina, V., Kasper, L., Hube, B., & Brunke, S. (2018). Metals in fungal virulence. *FEMS*  
863 *Microbiol Rev*, 42(1). doi:10.1093/femsre/fux050
- 864 Gilbert, A. S., Wheeler, R. T., & May, R. C. (2014). Fungal Pathogens: Survival and Replication within  
865 Macrophages. *Cold Spring Harb Perspect Med*, 5(7), a019661. doi:10.1101/cshperspect.a019661
- 866 GitHub. (2019). The official development repository for BCFtools.
- 867 Goldring, E. S., Grossman, L. I., Krupnick, D., Cryer, D. R., & Marmur, J. (1970). The petite mutation in  
868 yeast. Loss of mitochondrial deoxyribonucleic acid during induction of petites with ethidium  
869 bromide. *J Mol Biol*, 52(2), 323-335. doi:10.1016/0022-2836(70)90033-1
- 870 Graf, K., Last, A., Gratz, R., Allert, S., Linde, S., Westermann, M., . . . Hube, B. (2019). Keeping *Candida*  
871 commensal: how lactobacilli antagonize pathogenicity of *Candida albicans* in an in vitro gut  
872 model. *Dis Model Mech*, 12(9). doi:10.1242/dmm.039719
- 873 Guo, C., Sun, L., Chen, X., & Zhang, D. (2013). Oxidative stress, mitochondrial damage and  
874 neurodegenerative diseases. *Neural Regen Res*, 8(21), 2003-2014. doi:10.3969/j.issn.1673-  
875 5374.2013.21.009
- 876 Harju, S., Fedosyuk, H., & Peterson, K. R. (2004). Rapid isolation of yeast genomic DNA: Bust n' Grab.  
877 *BMC Biotechnology*, 4(1), 8. doi:10.1186/1472-6750-4-8
- 878 Holland, S. L., Reader, T., Dyer, P. S., & Avery, S. V. (2014). Phenotypic heterogeneity is a selected trait in  
879 natural yeast populations subject to environmental stress. *Environ Microbiol*, 16(6), 1729-1740.  
880 doi:10.1111/1462-2920.12243
- 881 Houang, E. T., Chappatte, O., Byrne, D., Macrae, P. V., & Thorpe, J. E. (1990). Fluconazole levels in plasma  
882 and vaginal secretions of patients after a 150-milligram single oral dose and rate of eradication  
883 of infection in vaginal candidiasis. *Antimicrob Agents Chemother*, 34(5), 909-910.  
884 doi:10.1128/aac.34.5.909
- 885 Hube, B. (2009). Fungal adaptation to the host environment. *Curr Opin Microbiol*, 12(4), 347-349.  
886 doi:10.1016/j.mib.2009.06.009

- 887 Kahl, B. C., Becker, K., & Loffler, B. (2016). Clinical Significance and Pathogenesis of Staphylococcal Small  
888 Colony Variants in Persistent Infections. *Clin Microbiol Rev*, 29(2), 401-427.  
889 doi:10.1128/CMR.00069-15
- 890 Kainz, K., Bauer, M. A., Madeo, F., & Carmona-Gutierrez, D. (2020). Fungal infections in humans: the  
891 silent crisis. *Microb Cell*, 7(6), 143-145. doi:10.15698/mic2020.06.718
- 892 Kasper, L., Seider, K., & Hube, B. (2015). Intracellular survival of *Candida glabrata* in macrophages:  
893 immune evasion and persistence. *FEMS Yeast Res*, 15(5), fov042. doi:10.1093/femsyr/fov042
- 894 Kaur, R., Castano, I., & Cormack, B. P. (2004). Functional genomic analysis of fluconazole susceptibility in  
895 the pathogenic yeast *Candida glabrata*: roles of calcium signaling and mitochondria. *Antimicrob  
896 Agents Chemother*, 48(5), 1600-1613. doi:10.1128/aac.48.5.1600-1613.2004
- 897 Kaur, R., Ma, B., & Cormack, B. P. (2007). A family of glycosylphosphatidylinositol-linked aspartyl  
898 proteases is required for virulence of *Candida glabrata*. *Proc Natl Acad Sci U S A*, 104(18), 7628-  
899 7633. doi:10.1073/pnas.0611195104
- 900 Keppler-Ross, S., Douglas, L., Konopka, J. B., & Dean, N. (2010). Recognition of yeast by murine  
901 macrophages requires mannan but not glucan. *Eukaryot Cell*, 9(11), 1776-1787.  
902 doi:10.1128/EC.00156-10
- 903 Krishnan, K., & Askew, D. S. (2014). Endoplasmic reticulum stress and fungal pathogenesis. *Fungal Biol  
904 Rev*, 28(2-3), 29-35. doi:10.1016/j.fbr.2014.07.001
- 905 Lamoth, F., Lockhart, S. R., Berkow, E. L., & Calandra, T. (2018). Changes in the epidemiological landscape  
906 of invasive candidiasis. *J Antimicrob Chemother*, 73(suppl\_1), i4-i13. doi:10.1093/jac/dkx444
- 907 Lodi, T., Dallabona, C., Nolli, C., Goffrini, P., Donnini, C., & Baruffini, E. (2015). DNA polymerase gamma  
908 and disease: what we have learned from yeast. *Front Genet*, 6, 106.  
909 doi:10.3389/fgene.2015.00106
- 910 Lorenz, M. C., Bender, J. A., & Fink, G. R. (2004). Transcriptional response of *Candida albicans* upon  
911 internalization by macrophages. *Eukaryot Cell*, 3(5), 1076-1087. doi:10.1128/EC.3.5.1076-  
912 1087.2004
- 913 Lüttich, A., Brunke, S., & Hube, B. (2012). Isolation and amplification of fungal RNA for microarray  
914 analysis from host samples. *Methods Mol Biol*, 845, 411-421. doi:10.1007/978-1-61779-539-8\_28
- 915 Moskvina, E., Schuller, C., Maurer, C. T., Mager, W. H., & Ruis, H. (1998). A search in the genome of  
916 *Saccharomyces cerevisiae* for genes regulated via stress response elements. *Yeast*, 14(11), 1041-  
917 1050. doi:10.1002/(SICI)1097-0061(199808)14:11<1041::AID-YEA296>3.0.CO;2-4
- 918 Nizet, V., & Johnson, R. S. (2009). Interdependence of hypoxic and innate immune responses. *Nat Rev  
919 Immunol*, 9(9), 609-617. doi:10.1038/nri2607
- 920 Pfaffl, M. W. (2001). A new mathematical model for relative quantification in real-time RT-PCR. *Nucleic  
921 Acids Res*, 29(9), e45.
- 922 Posteraro, B., Tumbarello, M., La Sorda, M., Spanu, T., Trecarichi, E. M., De Bernardis, F., . . . Fadda, G.  
923 (2006). Azole resistance of *Candida glabrata* in a case of recurrent fungemia. *J Clin Microbiol*,  
924 44(8), 3046-3047. doi:10.1128/JCM.00526-06
- 925 Proctor, R. A., von Eiff, C., Kahl, B. C., Becker, K., McNamara, P., Herrmann, M., & Peters, G. (2006). Small  
926 colony variants: a pathogenic form of bacteria that facilitates persistent and recurrent infections.  
927 *Nat Rev Microbiol*, 4(4), 295-305. doi:10.1038/nrmicro1384
- 928 Qin, G., Liu, J., Cao, B., Li, B., & Tian, S. (2011). Hydrogen peroxide acts on sensitive mitochondrial  
929 proteins to induce death of a fungal pathogen revealed by proteomic analysis. *PLoS One*, 6(7),  
930 e21945. doi:10.1371/journal.pone.0021945
- 931 Razew, M., Warkocki, Z., Taube, M., Kolondra, A., Czarnocki-Cieciura, M., Nowak, E., . . . Nowotny, M.  
932 (2018). Structural analysis of mtEXO mitochondrial RNA degradosome reveals tight coupling of  
933 nuclease and helicase components. *Nat Commun*, 9(1), 97. doi:10.1038/s41467-017-02570-5

- 934 Rodrigues, C. F., Silva, S., & Henriques, M. (2014). *Candida glabrata*: a review of its features and  
935 resistance. *Eur J Clin Microbiol Infect Dis*, 33(5), 673-688. doi:10.1007/s10096-013-2009-3
- 936 Sanglard, D., Ischer, F., & Bille, J. (2001). Role of ATP-binding-cassette transporter genes in high-  
937 frequency acquisition of resistance to azole antifungals in *Candida glabrata*. *Antimicrob Agents*  
938 *Chemother*, 45(4), 1174-1183. doi:10.1128/AAC.45.4.1174-1183.2001
- 939 Seider, K., Brunke, S., Schild, L., Jablonowski, N., Wilson, D., Majer, O., . . . Hube, B. (2011). The  
940 facultative intracellular pathogen *Candida glabrata* subverts macrophage cytokine production  
941 and phagolysosome maturation. *J Immunol*, 187(6), 3072-3086. doi:10.4049/jimmunol.1003730
- 942 Shingu-Vazquez, M., & Traven, A. (2011). Mitochondria and fungal pathogenesis: drug tolerance,  
943 virulence, and potential for antifungal therapy. *Eukaryot Cell*, 10(11), 1376-1383.  
944 doi:10.1128/EC.05184-11
- 945 Siscar-Lewin, S., Hube, B., & Brunke, S. (2019). Antivirulence and avirulence genes in human pathogenic  
946 fungi. *Virulence*, 10(1), 935-947. doi:10.1080/21505594.2019.1688753
- 947 Snarr, B. D., Qureshi, S. T., & Sheppard, D. C. (2017). Immune Recognition of Fungal Polysaccharides. *J*  
948 *Fungi (Basel)*, 3(3). doi:10.3390/jof3030047
- 949 SOURCEFORGE. (2014). BMAP: Short read aligner for DNA and RNA-seq data.
- 950 Sprenger, M., Kasper, L., Hensel, M., & Hube, B. (2018). Metabolic adaptation of intracellular bacteria  
951 and fungi to macrophages. *Int J Med Microbiol*, 308(1), 215-227. doi:10.1016/j.ijmm.2017.11.001
- 952 Thakur, J. K., Arthanari, H., Yang, F., Pan, S. J., Fan, X., Breger, J., . . . Naar, A. M. (2008). A nuclear  
953 receptor-like pathway regulating multidrug resistance in fungi. *Nature*, 452(7187), 604-609.  
954 doi:10.1038/nature06836
- 955 Thorpe, G. W., Fong, C. S., Alic, N., Higgins, V. J., & Dawes, I. W. (2004). Cells have distinct mechanisms to  
956 maintain protection against different reactive oxygen species: oxidative-stress-response genes.  
957 *Proc Natl Acad Sci U S A*, 101(17), 6564-6569. doi:10.1073/pnas.0305888101
- 958 Tiwari, S., Thakur, R., & Shankar, J. (2015). Role of Heat-Shock Proteins in Cellular Function and in the  
959 Biology of Fungi. *Biotechnol Res Int*, 2015, 132635. doi:10.1155/2015/132635
- 960 Toffaletti, D. L., Nielsen, K., Dietrich, F., Heitman, J., & Perfect, J. R. (2004). *Cryptococcus neoformans*  
961 mitochondrial genomes from serotype A and D strains do not influence virulence. *Curr Genet*,  
962 46(4), 193-204. doi:10.1007/s00294-004-0521-9
- 963 Tuchscher, L., Pollath, C., Siegmund, A., Deinhardt-Emmer, S., Hoerr, V., Svensson, C. M., . . . Löffler, B.  
964 (2019). Clinical *S. aureus* Isolates Vary in Their Virulence to Promote Adaptation to the Host.  
965 *Toxins (Basel)*, 11(3). doi:10.3390/toxins11030135
- 966 Tzagoloff, A., Akai, A., Needleman, R. B., & Zulch, G. (1975). Assembly of the mitochondrial membrane  
967 system. Cytoplasmic mutants of *Saccharomyces cerevisiae* with lesions in enzymes of the  
968 respiratory chain and in the mitochondrial ATPase. *J Biol Chem*, 250(20), 8236-8242.
- 969 Vylkova, S., & Lorenz, M. C. (2014). Modulation of phagosomal pH by *Candida albicans* promotes hyphal  
970 morphogenesis and requires Stp2p, a regulator of amino acid transport. *PLoS Pathog*, 10(3),  
971 e1003995. doi:10.1371/journal.ppat.1003995
- 972 Zhang, X., & Moye-Rowley, W. S. (2001). *Saccharomyces cerevisiae* multidrug resistance gene expression  
973 inversely correlates with the status of the F(0) component of the mitochondrial ATPase. *J Biol*  
974 *Chem*, 276(51), 47844-47852. doi:10.1074/jbc.M106285200
